1 **A plant-specific syntaxin-6 protein contributes to the intracytoplasmic route for**  
2 **begomoviruses**

3  
4 Bianca Castro Gouveia-Mageste<sup>1&</sup>, Laura Gonçalves Costa Martins<sup>1&</sup>, Maximiller Dal-Bianco<sup>1,2</sup>,  
5 João Paulo Batista Machado<sup>1,3</sup>, José Cleydson Ferreira da Silva<sup>1</sup>, Alice Y Kim<sup>4</sup>, Junshi Yazaki<sup>4,5</sup>  
6 Anésia Aparecida dos Santos<sup>1,6</sup>, Joseph R Ecker<sup>4,7</sup> and Elizabeth Pacheco Batista Fontes<sup>1,2\*</sup>

7  
8 <sup>1</sup>National Institute of Science and Technology in Plant-Pest Interactions, Bioagro, Universidade  
9 Federal de Viçosa, Viçosa, Minas Gerais, Brazil

10 <sup>2</sup>Department of Biochemistry and Molecular Biology, Universidade Federal de Viçosa, Viçosa,  
11 Minas Gerais 36570-000, Brazil

12 <sup>3</sup>Agronomy Institute, Universidade Federal de Viçosa, Campus Florestal, Florestal, Minas Gerais,  
13 Brazil

14 <sup>4</sup>Genomic Analysis Laboratory, Plant Biology Laboratory, Salk Institute for Biological Studies,  
15 La Jolla, CA 92037, USA

16 <sup>5</sup>RIKEN Center for Integrative Medical Sciences, Yokohama City, Kanagawa 230-0045, Japan

17 <sup>6</sup>Departament of General Biology, Universidade Federal de Viçosa, Viçosa, Minas Gerais, Brazil

18 <sup>7</sup>Howard Hughes Medical Institute and Plant Biology Laboratory, The Salk Institute of Biological  
19 Studies, La Jolla, United States of America

20

21 \*Corresponding author: [bbfontes@ufv.br](mailto:bbfontes@ufv.br)

22 &These authors contributed equally to this work

23 **Running title: NISP in begomovirus intracellular transport**

## 24 **Abstract**

25

26 Due to limited free diffusion in the cytoplasm, viruses must use active transport mechanisms to  
27 move intracellularly. Nevertheless, how the plant ssDNA begomovirus hijacks the host  
28 intracytoplasmic transport machinery to move from the nucleus to the plasmodesmata remains  
29 enigmatic. Here, we identified nuclear shuttle protein (NSP)-interacting proteins from Arabidopsis  
30 by probing a protein microarray and demonstrated that the *Cabbage leaf curl virus* (CabLCV)  
31 NSP, a facilitator of the nucleocytoplasmic trafficking of viral (v)DNA, interacts with an  
32 endosomal vesicle-localized plant-specific syntaxin-6 protein, designated NSP-interacting  
33 syntaxin-6 domain-containing protein (NISP) *in planta*. NISP displays a pro-viral function, but  
34 not the syntaxin-6 paralog AT2G18860 that failed to interact with NSP. Consistent with these  
35 findings, *nisp-1* mutant plants were less susceptible to begomovirus infection, a phenotype  
36 reversed by NISP complementation. NISP-overexpressing lines accumulated higher levels of viral  
37 DNA than wild-type. Furthermore, NISP interacted with NIG, an NSP-interacting GTPase  
38 involved in NSP-vDNA nucleocytoplasmic translocation. The NISP-NIG interaction was  
39 enhanced by NSP. We also showed that NISP associates with vDNA and might assemble a NISP-  
40 NIG-NSP-vDNA- complex. NISP may function as a docking site for recruiting NIG and NSP into  
41 endosomes, providing a mechanism for the intracytoplasmic translocation of the NSP-vDNA  
42 complex towards to and from the cell periphery.

43

## 44 **Author Summary**

45 As viruses must use an active and directed intracellular movement, they hijack the intracellular  
46 host transport system for their own benefits. Therefore, the identification of interactions between

47 host proteins and begomovirus movement proteins should target the intracellular transport  
48 machinery. This work focused on the identification of these protein-protein interactions; it  
49 addressed the molecular bases for the intracellular transport of begomoviruses. We used a protein  
50 microarray to identify cellular partners for the movement protein (MP) and the viral nuclear shuttle  
51 protein (NSP), which is a facilitator of the nucleocytoplasmic trafficking of viral (v)DNA. We  
52 identified relevant protein-protein interaction (PPI) hubs connecting host and viral proteins. We  
53 revealed a novel NSP-interacting protein, which functions in the intracytoplasmic transport of  
54 proteins and DNA from begomoviruses and was designated NSP-interacting syntaxin domain-  
55 containing protein (NISP). Our data suggest an intracellular route connecting the release of newly  
56 synthesized begomoviral DNA in the cytosol with the cell surface. Resolving viral DNA-host  
57 protein complexes led to the identification of a novel class of components of the cell machinery  
58 and a representative member, NISP, that functions as a susceptibility gene against begomoviruses.  
59 As geminiviruses pose a severe threat to agriculture and food security, this recessive gene can now  
60 be exploited as a target for engineering resistance by gene editing in crops.

61

62

## 63 **Introduction**

64

65       As obligate intracellular parasites, viruses must enter the host cells and hijack the cell  
66 machinery to complete their life cycle. Independent on the molecular mechanisms for virus entry  
67 into cells, which differ entirely between animal and plant viruses, once in the cytoplasm, both plant  
68 and animal viral genomes move intracellularly to specific cellular sub-compartments for  
69 replication, transcription or encapsidation [1,2]. Due to the limitation of free diffusion in the  
70 cytoplasm, viruses have invoked the endogenous host movement mechanisms for an active and  
71 directed intracytoplasmic translocation. In fact, almost all viruses are capable of subverting the  
72 microtubule transport system to some extent to replicate and spread. Plant viruses must also use  
73 an active mechanism to move the viral genome from the replication site to the plasmodesmata,  
74 which are intercellular cytoplasmic bridges between plant cells [2,3]. To promote this typical cell-  
75 to-cell movement, plant viruses have evolved movement proteins that increase the size exclusion  
76 limit of the plasmodesmata and actively promote the viral nucleic acid translocation into  
77 uninfected, adjacent cells [4]. In the case of viruses that replicate in the nuclei of infected cells,  
78 they have to be directed to the nuclear periphery, followed by nuclear entry. Likewise, the newly-  
79 synthesized viral proteins and viral genomes must translocate throughout the cytoplasm during  
80 exit. In animal cells, the retroviruses and DNA viruses deploy the microtubule motor system and  
81 microtubule cytoskeleton to move viral proteins and genomes into the nucleus and back to the  
82 plasma membrane [1, 5]. Geminiviruses are typical examples of plant DNA viruses that replicate  
83 in the nuclei of infected cells, but the underlying mechanisms for the intracytoplasmic movement  
84 of viral proteins and viral DNA (vDNA) are far less understood.

85       Geminiviruses are circular single-stranded (ss) DNA viruses, which replicate via double-



86 stranded (ds) DNA intermediates in the nucleus of infected cells, infect a broad spectrum of  
87 economically important crops and cause significant yield losses worldwide [6]. The *Geminiviridae*  
88 family includes nine genera, but approximately 75% of the identified species belong to the genus  
89 *Begomovirus*, which are whitefly-transmitted, infect dicotyledonous species, and display a genome  
90 configuration that can be either monopartite or bipartite [7,8]. The genomic components of the  
91 bipartite begomoviruses are designated DNA-A and DNA-B. The DNA-A encodes proteins  
92 required for viral replication (AC1 or Rep, REn or AC3), transactivation of viral genes (AC2 or  
93 TRaP), encapsidation of viral genome (AV1 or CP) and suppression of host defenses (AC4 and  
94 TrAP). DNA-B encodes the nuclear shuttle protein (NSP or BV1) and the movement protein (MP  
95 or BC1) involved in intracellular and cell-to-cell movement of vDNA.

96         Although the role of MP-NSP complex formation in mediating intracellular and  
97 intercellular transport of begomoviruses is widely accepted, the molecular mechanisms underlying  
98 the action of these viral proteins at individual stages of the intracellular and intercellular movement  
99 are still debated. Some studies indicated that NSP from *Bean dwarf mosaic virus* (BDMV) and  
100 *Abutilon mosaic virus* (AbMV) complexes with ss-vDNA and ds-vDNA presumably in the nuclei  
101 of infected cells, whereas NSP from *Squash leaf curl virus* (SLCV) binds only ss-vDNA *in vitro*  
102 [9, 10, 11]. NSP also interacts with MP in the cytoplasm [12], which promotes the directionality  
103 of virus translocation to the cell surface [12, 13]. The mechanism for vDNA exit from the nucleus  
104 remains unsolved. It has been conceptually accepted that NSP facilitates the nuclear exit of newly-  
105 replicated vDNA via nuclear pores [10, 14-17]. However, the interactions with the host nuclear  
106 transport machinery have not been documented. A piece of this puzzle was obtained with the  
107 identification of an NSP-interacting GTPase (NIG), which interacts with NSP at the cytosolic side  
108 of the nuclear pore complex and facilitates the release of NSP-vDNA complex from the nuclear

109 envelope into the cytosol [12, 18]. At this step, it has not been resolved whether NSP-vDNA is  
110 free in the cytosol or is transported via vesicles at their protoplasmic leaflet to the periphery.  
111 Consistent with this transport function, the cytosolic NIG (i) accumulates around the nuclear  
112 envelope, (ii) promotes the translocation of NSP-vDNA from the nucleus to the cytoplasm, (iii)  
113 functions as a pro-viral factor during begomovirus infection and (iv) shares structural features and  
114 transport properties with the human Rev-Interacting Protein (hRIP), which has been shown to be  
115 involved in the release of HIV-1 RNAs from the nuclear periphery to the cytoplasm [12, 18, 19].  
116 Histone H3 has been shown to bind NSP and MP from BDMV as an additional component of the  
117 vDNA-protein complex that traffics intracellularly and intercellularly [20]. A nuclear  
118 acetyltransferase (AtNSI) interacts with the *Cabbage leaf curl virus* (CabLCV) NSP and may  
119 regulate the nuclear export of ss-vDNA-NSP via acetylation of CP and histones [21, 22]. Other  
120 NSP-interacting partners include the receptor-like kinases (RLKs) NSP-interacting kinase (NIK1)  
121 and NSP-associated kinase (NsAK), which are not involved in intracellular movement of vDNA  
122 but rather are implicated in antiviral immunity against begomoviruses [23-26].

123         For the cell-to-cell transport of vDNA, two distinct mechanisms, which basically differ in  
124 the nature of the vDNA-protein complex translocated into adjacent cells, have been suggested [11,  
125 27]. In the first mechanism, designated “relay race” model, NSP facilitates the translocation of  
126 viral DNA from the nucleus to the cytoplasm and then is replaced by MP, which promotes the cell-  
127 to-cell movement of vDNA via plasmodesmata [10, 14]. The second mechanism represented by  
128 the “couple-skating” model preconizes that MP facilitates the vDNA-NSP nucleocytoplasmic  
129 trafficking and promotes the translocation of vDNA-NSP complex into the adjacent cells via  
130 endoplasmic-reticulum-derived tubules induced by the viral infection [11-13, 18, 28-32]. More  
131 recently, an alternative route for intracellular translocation and cell-to-cell spread of vDNA via

132 chloroplasts and stromules has been proposed, which was based on experimental data of AbMV  
133 MP interactions (33,34). AbMV infection has been shown to induce the formation of a stromule  
134 network interconnecting different chloroplasts, chloroplasts with nuclei, and expanding to the cell  
135 periphery presumably at plasmodesmata [34]. This stromule network is stabilized by the plastid  
136 chaperone cpHSC70, which has also been shown to interact with MP [33]. The interaction between  
137 MP and cpHSC70 may bridge viral nucleoprotein complexes with stromules. Independent on the  
138 cell-to-cell transport models, the underlying mechanisms of the intracytoplasmic retrograde and  
139 anterograde movements of vDNA complexes remain to be determined. CabLCV and SLCV MPs  
140 have been shown to interact with synaptotagmin A (SYTA), which is located in the endosomes of  
141 plant cells and is required for the cell-to-cell trafficking of different MPs [35]. These findings  
142 raised the hypothesis that distinct viral MPs promote an intracytoplasmic transport of vDNA-  
143 complexes to plasmodesmata via an endocytic recycling pathway. Likewise, the AbMV MP has  
144 been shown to interfere with microtubule assembly and stability when co-expressed in plant tissues  
145 with a viral inducer of cell progression, which may suggest a microtubule-associated transit of MP  
146 or begomoviruses to the plasmodesmata [36]. However, the host components of the vDNA  
147 complex competent for intracytoplasmic translocation have not been identified, and the underlying  
148 mechanism for intracytoplasmic trafficking of vDNA remains to be elucidated.

149         In this investigation, we used a protein microarray assay to identify MP- and NSP-host  
150 protein-protein interactions (PPIs). From the NSP-MP-host PPI network map, we selected an  
151 intracellular transport-associated protein, designated NSP-interacting syntaxin domain-containing  
152 protein (NISP), as an NSP specific target, to gain further insight into the intracytoplasmic transport  
153 of begomoviruses. We showed that NISP, which was located in motile vesicle-like structures,  
154 many of which were targeted to the endosomes, interacted with NSP *in vivo* and displayed a pro-

155 viral function. Furthermore, NISP also interacted with NIG, and the complex formed was enhanced  
156 by the presence of viral NSP. In addition, vDNA might have been recruited into the NISP complex.  
157 Our data indicate that NISP might be part of the vDNA complex that traffics intracellularly via  
158 endosomes.

159

160

## 161 **Results**

162

### 163 **Identification of Arabidopsis proteins interacting with *in vitro* transcribed and translated** 164 **MP and NSP**

165 To search for the begomovirus movement proteins-Arabidopsis protein-protein  
166 interactions (PPIs), we used a nucleic acid programmable protein array (NAPPA)-based approach  
167 [37], in which we interrogated 4600 *in vitro* synthesized ORFs from Arabidopsis for their capacity  
168 to be targeted by MP and/or NSP from CabLCV. The *in situ* synthesized NAPPA protein  
169 microarray has previously generated a transcription factor (TF)-NAPPA dataset, which has been  
170 validated by pull-down assays and bimolecular fluorescence complementation (BiFC) assays in *N.*  
171 *benthamiana* leaves using a subset of newly identified interactions [37]. NSP and MP were *in vitro*  
172 transcribed and translated to probe this protein microarray (S1a and S1b Fig). A total of 40  
173 candidate proteins were identified each for MP and NSP. The majority (35 proteins of 40) were  
174 found to interact with both proteins, which was not surprising because MP itself interacts with  
175 NSP and may be part of common multiprotein complexes as both participate in viral DNA  
176 movement (S2 Fig). We found five new NSP-specific protein interactions (dark orange) and five  
177 MP-specific protein interactions (light yellow), including a peptidyl-prolyl cis-trans isomerase

178 family protein (AT1G73655) belonging to the same protein family as Pin4, which has been shown  
179 previously to interact with MP (S1 Table) [36]. As previously identified NSP-interacting proteins  
180 were absent in the protein array, the identification of known MP-specific interacting protein  
181 contributed to validate our current data.

182         The protein-protein interactions between the viral proteins and the Arabidopsis proteins  
183 were integrated into the protein-protein interactome experimentally determined for *Arabidopsis*  
184 *thaliana* (BioGRID database and the Arabidopsis interactome database), using Cytoscape  
185 software. This procedure identified the PPI network containing MP, NSP and all, directly and  
186 indirectly, interacting host proteins (Fig 1). AT1G68185, an ubiquitin-like protein, which formed  
187 a large hub (hub 20, degree 148), may represent a convergent targeting node among begomovirus  
188 viral proteins as it was found to be a direct target of NSP and MP independently (S1 Table).  
189 Furthermore, the ubiquitin-proteasome pathway (UPS) is targeted by many viruses to maintain  
190 suitable levels of viral proteins and to induce, inhibit or modify ubiquitin (Ub)-related host proteins  
191 [38]. Other MP-interacting proteins, including FKBP-like peptidyl-prolyl cis-trans isomerase  
192 family protein (this work), chloroplast heat shock protein 70-1 [33] and synaptotagmin A [35],  
193 which have been shown to assist the MP movement function, are connected to the AT1G68185  
194 hub (hub 20), further supporting the notion that this hub may be biologically significant during  
195 begomovirus infection.

196         To gain further insights into the cellular processes affected by NSP or MP, we performed  
197 functional enrichment analyses of their direct and indirect interactors. Significantly enriched GO  
198 terms (with  $p$ -value < 0.05) were identified in all three categories, Biological Process, Molecular  
199 Function, or Cellular Component ontology (S2 Table). Some over-represented GO terms in this  
200 set of viral protein-interacting host proteins are consistent with NSP and MP function or

201 localization. Consistent with their function as viral movement proteins, a subset of host interactors  
202 was significantly over-represented under the transport activity term and protein binding term in  
203 Molecular Function (S2 Table). Under the cellular component ontology, we observed an over-  
204 representation of proteins under membrane-bounded organelle term, intracellular vesicle term, and  
205 SNARE complex term, which may suggest an intracytoplasmic route for begomovirus proteins  
206 and vDNA trafficking (S2 Table). Accordingly, two NSP-interacting proteins, AT5G23550 and  
207 AT4G30240, form convergent hubs (17 and 19) enriched for membrane-bound proteins and  
208 transport activity function (Fig 1, S1 Table). The NSP-interacting protein AT5G23550 (hub 17)  
209 is annotated as a Got1/Sft2-like vesicle transport protein, which may be located to a late-Golgi  
210 compartment and may be involved in the fusion of retrograde transport vesicles derived from an  
211 endocytic compartment with the Golgi complex [39]. Likewise, AT4G30240 (hub 19) is a soluble  
212 N-ethylmaleimide-sensitive factor attachment protein receptor (SNARE)-like protein harboring a  
213 syntaxin-6 domain typical of proteins found in the endosomal transport vesicles [40].

214 Under the biological process ontology, the response to auxin term represented a  
215 significantly enriched GO term, which has not been previously associated with begomovirus  
216 infection (S2 Table). The NSP-MP-host PPI network uncovered two relevant hubs enriched for  
217 auxin response-related proteins, which are represented by an NSP-MP general interaction-derived  
218 hub (Fig 1, hub 9) and an NSP-specific host interaction-derived hub (hub 11). Remarkably, these  
219 two viral protein hubs are interconnected to each other via interactions with proteins (in gray),  
220 which are also over-represented under the auxin response term, forming a large auxin affected hub  
221 target by begomovirus (S1 Table). This hub may represent an undocumented biological process  
222 affected by begomovirus infection. The resulting PPI network map may provide a framework for

223 future studies in detailing the begomovirus complex life cycle. One such example is described  
224 here, as following.

225

226 **A SNARE-like protein designated NSP-Interacting Syntaxin domain-containing Protein**  
227 **(NISP), but not its paralog, interacts with NSP via the syntaxin domain**

228 The NSP-MP-Host PPI network uncovered enriched GO terms linked to intracellular  
229 vesicle and membrane-bound proteins, which may be associated with a mechanism for  
230 intracytoplasmic translocation of viral proteins and vDNA. To pursue further with this possible  
231 connection and to validate further the microarray data, we selected a new specific NSP-interacting  
232 protein, the SNARE-like protein AT4G30240, which harbors a syntaxin-6 domain at the N-  
233 terminus and a transmembrane segment at the C-terminus, for further analyses (Fig 2a). SNARE-  
234 complexes drive the fusion of membrane-bound vesicles with target membranes required for  
235 intracellular transport via the endosome system. We used the syntaxin domain superfamily as the  
236 prototype for the identification of homologs in the genomes of *Arabidopsis thaliana*, *Oryza sativa*,  
237 *Drosophila melanogaster*, *Homo sapiens*, and *Saccharomyces cerevisiae*. We then selected the  
238 most related proteins to construct phylogenetic trees using Bayesian inference method (S3a Fig).  
239 AT4G30240 was clustered in pair with AT2G18860 and formed a clade of syntaxin-6 domain-  
240 containing proteins, which also included a third Arabidopsis paralog AT1G27700. This  
241 AT4G30240-derived clade (in red), also designated Syntaxin-6-like subgroup, clustered only plant  
242 proteins, carrying an N-terminal syntaxin-6-like domain and a C-terminal transmembrane  
243 segment. AT4G30240 and AT2G18860 may be a result of genome duplication, as these syntaxin-  
244 6-like proteins clustered in pair even in phylogenetic analyses that include proteins from other

245 organisms, share a high degree of sequence conservation and display similar intron/genomic DNA  
246 configuration (<https://www.arabidopsis.org/>).

247 The remaining syntaxin-6-like proteins clustered together in a distinct clade that included  
248 proteins from human, rice and the Arabidopsis AT1G28490, also named SYP61, a characterized  
249 trans-Golgi network (TGN)/endosome localized syntaxin [41-43]. This SYP61 second clade (in  
250 orange) was designated target (t)-syntaxin-6/SNARE-like subgroup, as it included structurally  
251 similar proteins carrying the N-terminal syntaxin-6 domain and also a t-SNARE coiled-coil  
252 homology domain at the C-terminus.

253 However, the syntaxin-6-like subgroup represents a newplant-specific class in the t-  
254 SNARE superfamily, since it lacks the coiled-coil t-SNARE domain at the C-terminus, which is  
255 responsible for vesicle fusions. A function of this subgroup has to be determined, yet. This  
256 hypothesis was further confirmed in a phylogenetic analysis of syntaxin-6 domain-containing  
257 proteins from *Arabidopsis thaliana*, *Oriza sativa*, *Glycine max*, *Zea mays*, *Zostera marina*, *Homo*  
258 *sapiens*, *Mus musculus*, *Bos taurus*, *Equus caballus*, *Danio rerio*, and *Drosophila melanogaster*  
259 using the full-length sequence of AT4G30240 as prototype (S3b Fig). The syntaxin-6 domain-  
260 containing proteins form two distinct clades with high internal stability (100%). The AT4G30240-  
261 derived clade, syntaxin-6-like clade, includes only plant syntaxin-6-like proteins.

262 To complement the protein microarray data, we used the yeast two-hybrid system to  
263 examine further the NSP-AT4G30240 interaction and compared the paralog AT2G18860 in our  
264 assays, which was not present in the protein microarray. The second most closely related paralog,  
265 AT1G28490, was present in the protein microarray but was not found to interact with NSP. Co-  
266 expression of the full-length AT4G30240 (NISP) ORF fused to the activation domain (AD), and  
267 NSP fused to the binding domain (BD) of GAL4 promoted histidine prototrophy (Fig 2b). The



268 HIS3 marker gene was not activated in yeast cells cotransformed with the controls. In contrast,  
269 AT2G18860 failed to interact with NSP in yeast, as neither AD-AT2G18860 nor BD-AT2G18860  
270 promoted his prototrophy when cotransformed with the respective cognate BD-NSP or AD-NSP  
271 (Fig 2c).

272 To map the NSP-interacting domain on NISP, we generated NISP deletion fragments and  
273 assay for protein interactions by two-hybrid assay. The N-terminal NISP fragment extending up  
274 to amino acid position 107 and containing an intact syntaxin-6 domain (NISP<sup>1-107</sup>, Fig 2a) was  
275 sufficient to bind NSP in yeast (Fig 2d). The interaction of the truncated NISP<sup>1-107</sup> with NSP was  
276 specific because the HIS marker gene was not activated in yeast cells co-transformed with AD- or  
277 BD-truncated NISP<sup>1-107</sup> and the empty vectors (Fig 2d). In contrast, the NISP truncated versions,  
278 comprising the NISP internal region, delimited by positions 105-200 (NISP<sup>105-200</sup>; Fig 2e) or the  
279 C-terminal portion (NISP<sup>200-300</sup>; Fig 2f), were not capable of recognizing NSP, confirming that  
280 NISP binds NSP via its syntaxin-6 domain. Although the syntaxin-6 domains of NISP and  
281 AT2G18860 are conserved (78.57% identity), NSP interacts specifically with NISP in yeast (Fig  
282 2b). Sequence alignment revealed an 8-amino acid deletion at the syntaxin-6 domain of  
283 AT2G18860 as the most striking feature that may account for the differences in protein binding  
284 specificity (S4 Fig).

285 Although NISP lacks a typical coiled-coil t-SNARE domain, it harbors a syntaxin-6  
286 domain at the N-terminus and a predicted transmembrane segment at the C-terminus, which  
287 suggests an endomembrane-bound localization (Fig 2a). Mammalian syntaxin-6 domain proteins  
288 are localized in the trans-Golgi network (TGN) membranes and endosomal vesicles [44]. To  
289 examine the subcellular localization of NISP, we transiently expressed AT4G30240 fused to a  
290 green fluorescent protein (GFP) under the control of the native and constitutive promoters, in

291 *Nicotiana benthamiana* leaves and analyzed the localization of the fluorescent signal by confocal  
292 microscopy. NISP-GFP was predominantly localized in motile spherical structure, resembling  
293 vesicles (Fig 3a, 3b; S1 Video). The paralog AT2G18860 fused to GFP appeared concentrated  
294 predominantly in membrane-bound vesicles and plasma membrane (S5 Fig).

295 To examine more precisely the NISP localization, we performed co-localization assays,  
296 using SYTA-mCherry as an endosome-associated marker [35], the plasma membrane-associated  
297 molecular marker FLS2-mCherry [45], ER-, TGN- and tonoplast-associated molecular markers  
298 constructed by Nelson et al. [46]. NISP-GFP did not co-localize with ER-mCherry- (Fig 3c,  
299 asterisks indicate the field of the insets) and tonoplast (vac-mCherry)- (Fig 3e) associated  
300 molecular markers. Likewise, NISP-containing vesicles did not co-localize with the plasma  
301 membrane FLS2-mCherry (Fig 3f). In contrast, a small population of NISP-GFP-containing  
302 vesicles co-localized with the TGN-associated molecular marker (Fig 3d) and a large fraction of  
303 NISP-GFP-containing vesicles precisely co-localized with the endosomal protein SYTA-mCherry  
304 (Fig 3g). Because many of the NISP-labeled vesicles were associated with the plasma membrane,  
305 we examined whether the NISP-associated vesicle membrane was derived from the plasma  
306 membrane by staining NISP-GFP-expressing cells with FM4-64, a marker for plasma membrane  
307 internalization that labels endosomes [47]. In addition to dye-labeled plasma membranes, some  
308 vesicles showed also NISP-GFP fluorescence (Fig 3H, arrows). Collectively, these results indicate  
309 that NISP localizes in TGN/early endosome vesicles.

310

### 311 **NISP interacts with NSP in intracellular vesicles**

312 We next examined whether NISP interacts with NSP *in vivo* using the bimolecular  
313 fluorescence complementation (BiFC) assay. The formation of NISP/NSP complexes occurred

314 atvesicles of *N. benthamiana* epidermal cells independent of the orientation of the NISP fusions  
315 (N-terminus or C-terminus of YFP; Fig 4a), and the reconstituted fluorescent signal was much  
316 higher than that of the background (control panels with combinations of the protein fusions with  
317 empty vectors). The reconstituted fluorescent signal was co-labeled by FM4-64, indicating that the  
318 complex was formed in endosomal vesicles derived from the plasma membrane (Fig 4b, see  
319 arrows). We further demonstrated that NISP and NSP interacted *in vivo* using co-  
320 immunoprecipitation assays. Both NISP-GFP and NSP-6HA, were co-immunoprecipitated from  
321 co-infiltrated extracts using anti-GFP antibody, demonstrating an association of NISP-GFP with  
322 NSP-6HA fusions (Fig 4c). Switching the protein tags and including MP did not alter the results  
323 because NISP-6HA also associated with NSP-GFP in co-infiltrated extracts (Fig 4d). Co-  
324 expression of MP in the assay was used to mimic infection, since CabLCV MP promotes the  
325 directionality of NSP to the cell periphery (12, 13). The Co-IP results also demonstrated that GFP  
326 alone did not interact with either NSP-6HA or NISP-6HA, demonstrating the specificity of the  
327 interactions between the viral protein and NISP.

328

### 329 **NISP, but not its paralog AT2G18860, displays a pro-viral function**

330 The biological relevance of the NSP-NISP interactions in begomovirus infection was  
331 examined using several different approaches. We first analyzed the expression of NISP from  
332 publically available RNA-seq data, which showed that NISP was induced by begomovirus  
333 infection [26]. Quantitative RT-PCRs showed that NISP RNAs, but not the RNA from the NISP  
334 paralog AT2G18860, were induced by the begomovirus infection (S6 Fig). We then identified a  
335 T-DNA insertion mutant in the NISP gene (*nisp-1*) and the AT2G18860 gene (*at2g18860-1*). The  
336 *NISP* or AT2G18860 transcript levels in the respective T-DNA insertion mutant lines were much

337 lower than in Col-0, indicating that *nisp-1* and *at2g18860-1* may be loss-of-function mutant lines  
338 (Fig 5a, 5c). These mutant lines were transformed with *NISP-GFP* or AT2G18860-GFP constructs  
339 to analyze a complementation of the defects in three independent lines each (Fig 5a, 5b, *nisp-*  
340 *1*/NISP lines, and *at2g18860-1*/AT2G18860 lines). We also prepared transgenic lines  
341 overexpressing *NISP-GFP* and AT2G18860-GFP, under the control of the 35S constitutive  
342 promoter. The respective transcript (Fig 5a, 5c) levels were higher in NISP and AT2G18860 plants  
343 than in Col-0 and accumulation of the encoding proteins was determined by immunoblotting with  
344 an anti-GFP antibody (Fig 5b, 5d). The knockout and overexpressing lines were phenotypically  
345 indistinguishable from Col-0 (S8 Fig).

346 We next examined whether *NISP* and AT2G18860 participate in begomovirus infection.  
347 The knockout lines (*nisp-1* and *at2g18860-1*), complemented lines (*nisp-1*/NISP and *at2g18860-*  
348 *1*/AT2G18860), *NISP*-overexpressing lines and Col-0 were inoculated with infectious clones of  
349 CabLCV and the course of infection was monitored by visualization of symptom development and  
350 PCR diagnosis. The accumulation of viral DNA was quantified by qPCR (Fig 5).

351 The *nisp-1* knockout line displayed attenuated symptoms (Fig 5e, S7 Fig), delayed course  
352 of infection (Fig 5f), and lower viral DNA as compared to Col-0 (Fig 5g). Expression of NISP-  
353 GFP in *nisp-1* restored the wild type susceptibility to begomovirus infection in all three  
354 independently transformed lines (*nisp-1*/NISP), confirming that the reduced susceptibility  
355 displayed by the *nisp-1* line was indeed due to loss of *NISP* function. In contrast, *NISP*  
356 overexpression conferred enhanced susceptibility to begomovirus infection; the progress of  
357 infection was accelerated (Fig 5f), and viral DNA load was significantly higher in the *NISP-*  
358 overexpressing lines than in Col-0 and *nisp-1* lines (Fig 5g). We predicted that if NISP-NSP  
359 binding was the basis for the NISP pro-viral function, the closest paralog of NISP, AT2G18860,

360 which harbors the syntaxin-6-like domain but does not interact with NSP, would not affect  
361 begomovirus infection. Accordingly, the *at2g18860-1* knockout line, *at2g18860-1/AT2G18860*  
362 complemented lines, and an *AT2G18860*-overexpressing line displayed similar symptoms, course  
363 of infection and viral DNA load as Col-0, indicating that the presence or absence of the  
364 *AT2G18860* gene does not change the begomovirus infection (Fig 5e, 5f, 5g, S7 Fig). These results  
365 further substantiated a specific pro-viral function of NISP rather than of syntaxin-6 like domain  
366 proteins in general.

367

### 368 **NISP also interacts with NIG and complex formation is enhanced by viral NSP**

369 There is a gap in our knowledge of how the vDNA-NSP complex, which binds to NIG in  
370 the cytosolic side of the nuclear pores, traffics to the cell periphery. From the PPI network map,  
371 we hypothesized that NIG could serve as a bridge to attach vDNA to the intracellular transport  
372 system of plant cells. The integration of our data with the Arabidopsis interactome uncovered a  
373 possible interaction between NIG and NISP, which was also shown here to bind specifically to  
374 viral NSP. The interaction between NIG and NISP was first demonstrated by two-hybrid assay  
375 (S9a Fig). The co-expression of the NISP ORF fused to BD and NIG ORF fused to AD from GAL4  
376 promoted histidine prototrophy in medium supplemented with 2.5 mM 3AT, whereas co-  
377 expression with empty vectors did not.

378 To examine whether NIG and NISP interact *in vivo*, we used BiFC and co-  
379 immunoprecipitation assays. NIG has been shown to be unevenly distributed around the nuclear  
380 envelope, and cell periphery (S9b and S9c Fig) [25, 48]. In the BiFC analyses, nYFP-NIG as well  
381 as cYFP-NISP (and vice-versa) were localized at the cell periphery (Fig 6a), probably at the NISP  
382 endosomes, since the structures were co-stained by FM4-64 (Fig 6b; arrows). The fluorescent

383 signal was barely detected in the controls (Fig 6a). The inclusion of NSP-6HA in the BiFC assay  
384 increased the NISP-NIG complex formation, as judged by the enhanced intensity of the  
385 reconstituted fluorescent signal, showing the fluorescent vesicles associated with the plasma  
386 membrane (S10 Fig). To provide further evidence of the NSP-mediated enhancement of NIG-  
387 NISP interaction, we used a quantitative co-immunoprecipitation assay (Fig 6, S9 Fig). We first  
388 confirmed that NIG interacts with NISP *in vivo* (Fig 6c, S10d). The Co-IP results indicated that  
389 NISP-GFP, but not GFP alone, interacted with NIG-HA. Likewise, NIG-GFP, but not GFP alone,  
390 interacted with NISP-HA. NSP promoted a stronger association of NISP-GFP with NIG-6HA, as  
391 judged by the amount of co-immunoprecipitated NIG by anti-GFP in the presence of co-expressed  
392 GST-NSP (Fig 6d, 6e). Likewise, GST-NSP enhanced NISP-6HA-NIG-GFP complex formation  
393 (S9e and S9f Fig). These results indicate that NSP/NIG and NISP might form a multiprotein  
394 complex at endosomes. Syntaxin-6 domain-containing proteins have been shown to participate in  
395 the endosome-plasma membrane route of protein cargos.

396

### 397 **NISP complexes viral DNA in vivo**

398 The current model of vDNA intracellular translocation informs that NSP binds to nascent  
399 viral DNA in the nucleus, facilitates its translocation to the cytosol via nuclear pores and moves  
400 vDNA intracytoplasmically to the cell periphery, where MP mediates the intercellular movement  
401 of vDNA-NSP or vDNA-MP via plasmodesmata. Because NSP also binds to NISP in vesicle-like  
402 structures, we asked whether the vDNA would be recruited into a NISP multi-protein complex  
403 using a modified chromatin immunoprecipitation (ChIP) assay (Fig 7). In our assay, proteins and  
404 DNA were first cross-linked with formaldehyde and then the protein-DNA complexes were  
405 immunoprecipitated with antibody (anti-GFP for NISP-GFP) from total protein extracts. The

406 untransformed line (Col-0) and NISP-GFP-overexpressing (AtNISP-1, AtNISP-2, and AtNISP-3,  
407 Fig 7a) lines were infected with CabLCV infectious clone and the modified ChIP assay was  
408 performed using an anti-GFP antibody. We confirmed first that the inoculated plants were infected  
409 (IN) by performing PCR from input DNA using CabLCV-specific primers, which amplify a 770-  
410 bp fragment from CabLCV DNA-B (Fig 7b and S11b Fig, primers F1/R1) and a 389-bp fragment  
411 from DNA-A (Fig 7e and S11a Fig, primers F1/R1). This viral DNA-B and DNA-A fragments  
412 were also amplified from ChIP-DNA of infected (IN) AtNISP-overexpressing lines but not of  
413 infected (IN) or uninfected (UN) Col-0, which lacks GFP-tagged NISP (Fig 7a, 7e). Using two  
414 sets of DNA-B-specific primers (F2/R2 and F3/R3, S10b Fig), ChIP-qPCR further demonstrated  
415 significant enrichment of DNA-B-specific fragments in infected AtNISP-GFP-overexpressing  
416 samples, which had been precipitated with anti-GFP serum, but not in pulled down samples from  
417 infected Col-0 lines (Fig 7c and 7d). Likewise, the use of F2/R2 set of DNA-A primers (S10a Fig  
418 10a) also resulted in significant enrichment of the DNA-A-specific fragment in ChIPed DNA from  
419 infected AtNISP-GFP-overexpressing samples but not from infected Col-0 (Fig 7f). Collectively,  
420 our results indicate that NISP is a functional component of the vDNA-complex that traffics along  
421 the cytoplasm to the cell periphery for the MP-mediated cell-to-cell movement of vDNA into  
422 adjacent cells.

423

## 424 **Discussion**

425

426 Viruses are obligate intracellular parasites and, once in the host cell cytoplasm, they must  
427 move intracellularly to and from the replication site to the plasma membrane for spreading. The  
428 cytoplasmic limitations on free diffusion have forced viruses to evolve efficient mechanisms to

429 manipulate the host transport system for their benefit. Understanding how viruses hijack the host  
430 intracellular transport system using a limited repertoire of proteins provides an opportunity to  
431 uncover the molecular bases of the host transport machinery. Bipartite begomoviruses, plant  
432 ssDNA viruses, use two movement proteins, MP and NSP, to move intracellularly from the site of  
433 replication in the nucleus to the cell surface [17]. However, the host components of the vDNA  
434 complex competent for intracytoplasmic translocation have not been identified, and the underlying  
435 mechanism for intracytoplasmic trafficking of vDNA remains to be elucidated. Here, we used a  
436 previously fabricated, *in situ* synthesized protein microarray containing 4600 Arabidopsis ORFs  
437 [37] to identify NSP- and MP-Arabidopsis protein-protein interactions (PPIs). Consistent with the  
438 movement function of the viral proteins, the identified NSP-MP-PPI network uncovered direct and  
439 indirect interactions, over-represented under transport activity, protein binding, membrane-bound  
440 organelles, intracellular vesicle, and SNARE complex ontology terms, which may define an  
441 intracellular route for vDNA trafficking. Precedents in the literature have implicated a  
442 microtubule-associated intracellular movement of viral proteins and vDNA in addition to an  
443 endocytic recycling pathway for the MP-mediated cell-to-cell movement of vDNA protein  
444 complexes (35; 36]. Accordingly, transport function-related proteins, including kinesin motor  
445 protein, plant syntaxin 121, Rab GTPase, Ras, Got1/Sft2-like vesicle transport protein, target  
446 SNARE coiled-coil domain protein, syntaxin-6 plant proteins, prenylated Rab acceptor, Heat  
447 shock protein 70 (Hsp 70), nuclear pore anchor, synaptotagmin A, were over-represented in the  
448 MP-NSP- PPI network. These studies thus provided a critical framework for future investigations  
449 to elucidate the molecular mechanisms for intracytoplasmic transport of begomoviruses.

450 **The NSP-interacting syntaxin domain-containing protein (NISP) is identified as a new**  
451 **functional cellular partner of begomovirus NSP**



452 In the present investigation, we characterized an NSP-specifically interacting syntaxin-6  
453 domain-containing protein, designated NISP and provided several lines of evidence indicating that  
454 NISP might be involved in the intracytoplasmic movement of NSP-vDNA. First, co-localization  
455 studies using organelle-associated molecular markers, and the FM4-64 marker demonstrated that  
456 NISP is associated with TGN/early endosomal vesicles. Second, we confirmed that NISP  
457 interacted with NSP *in planta* and showed that the complex formation occurred in vesicle-like  
458 structures, which resemble the NISP-associated TGN/endosomal vesicles, the typical subcellular  
459 localization of syntaxin-6-like proteins from Arabidopsis and humans [49]. Third, we showed that  
460 NISP exhibits a pro-viral function, and begomovirus infection required NISP-NSP interaction. The  
461 mutant *nisp-1* was less susceptible to begomovirus as the knockout lines displayed attenuated  
462 symptoms, a delayed course of infection, and accumulated much lower viral DNA as compared to  
463 Col-0. In contrast, the overexpressing lines were more susceptible to begomovirus. We took  
464 advantage of a highly conserved NISP paralog, AT2G18860, to show that NISP-NSP interaction  
465 was the molecular basis for the NISP pro-viral function. AT2G18860, which shares with NISP a  
466 78,6% identical syntaxin-6 domain, did not interact with NSP and thus did not interfere with  
467 begomovirus infection. Consistent with these data, NISP, but not AT2G18860, is induced by  
468 begomovirus infection. Fourth, NISP also interacted with NIG, which facilitates the release of the  
469 NSP-DNA complex from the nuclear pores to the cytosol [12,18], and the presence of NSP  
470 enhanced the NISP-NIG complex formation, indicating that NSP, which interacts with NIG [12]  
471 and NISP (Fig 4), may be recruited by the complex. We used ChIP assay to demonstrate that NISP  
472 was also associated with vDNA in infected cells, which may be assembled into a NISP-NIG-NSP  
473 multiprotein complex. Finally, the NISP interactions relocated the dispersed cytosolic NIG and  
474 viral NSP to trafficking vesicle resembling the NISP-containing spherical structure associated with

475 TGN/endosome. The NISP-mediated translocation of NSP-vDNA to endosomal vesicles favors  
476 the association of the viral complex with MP, which is brought to the endosome via interaction  
477 with the endosome-associated SYTA for the MP-mediated cell-to-cell movement of vDNA [35].

478

479 **NISP belongs to a new, previously unidentified plant-specific subfamily of syntaxin-6-like**  
480 **proteins**

481 The phylogenetic reconstruction of syntaxin-6 domain-containing proteins from different  
482 eukaryotic organisms divided this family into two subclades, one containing proteins from all  
483 tested organisms, including SYP61 from Arabidopsis, and a new, previously unidentified plant-  
484 specific subclade, which includes NISP and AT2G18860 paralogs clustered in pair. SYP61 has  
485 been shown to form functional SNARE complexes involved in the vacuolar-TGN recycling  
486 pathway and in exocytotic trafficking to the plasma membrane [43,50]. The process of membrane  
487 fusion is the final step of vesicle transport, which is generally driven by a specific pairing of 1 v-  
488 SNAREs with the 2 or 3 cognate t-SNARE molecules into a trans-SNARE complex [49, 51]. The  
489 proteins from the SYP61 subclade contain the typical structural configuration of t-SNARES,  
490 including the N-terminal syntaxin-6 domain, followed by a C-terminal t-SNARE coiled-coil  
491 homology domain and a transmembrane segment at the C-terminus. The proteins from the NISP  
492 subclade harbor the N-terminal syntaxin-6 domain and the transmembrane segment but lack a C-  
493 terminal SNARE domain, which may impair the participation of these new syntaxin-6-like proteins  
494 in the assembly of a functional trans-SNARE complex for membrane fusion. Nevertheless, we  
495 have demonstrated that a representative of this new syntaxin-6 subclade, NISP, is functionally  
496 expressed in plant cells. In addition to being induced by begomovirus infection, NISP functions as  
497 a susceptibility factor to begomoviruses, forms complexes with viral and host proteins and is

498 located in TGN/endosome-associated vesicles. We also mapped the NSP-binding domain on NISP  
499 to the syntaxin-6 domain. Therefore, we propose that NISP may function as an intracellular vesicle  
500 docking site to which the cargo proteins are specifically recruited through interactions with the  
501 syntaxin-6-like domain.

502 We also showed that members of the new syntaxin-6 subclade might diverge functionally  
503 concerning protein-protein binding specificity. The NISP paralog, AT218860, which shares with  
504 NISP a conserved syntaxin-6 domain (78.6% identity), fails to interact with viral NSP and hence  
505 does not affect begomovirus infection. Therefore, specificity of protein interactions may rely on  
506 marginal features of the syntaxin-6 domain. A striking difference between NISP and AT2G18860  
507 is an eight-amino acid deletion toward the N-terminus of the syntaxin-6 domain, which may  
508 account for the NISP specificity to NSP (S4 Fig). Complementary studies are necessary to  
509 precisely define the determinants of a functional syntaxin-6 domain for NSP interaction, which  
510 will be useful for engineering resistance to begomoviruses.

511

### 512 **NISP may participate in the intracytoplasmic transport of NSP-vDNA**

513 Based on the current data and others previously reported data, we propose a model for the  
514 NISP integration into an intracytoplasmic transport route used for the begomovirus anterograde  
515 movement. Begomoviruses replicate in the nuclei of infected cells, where NSP interacts with  
516 newly-synthesized vDNA and facilitates the translocation of vDNA to the cytoplasm via nuclear  
517 pores [13, 32]). This nuclear exportation process may be mediated by an exportin-like protein yet  
518 to be identified. At the cytosolic side of the nuclear envelope, NIG associates with the NSP-vDNA  
519 complex to accessorize the release of NSP-vDNA from the nuclear pores into the cytosol [12,18].  
520 The pro-viral function of NIG is associated with its cytosolic localization because the WWP1-

521 mediated recruitment of NIG into nuclear bodies impairs begomovirus infection [48]. At the  
522 cytosol, we showed here that NISP may recruit the NIG-NSP-vDNA complex to TGN/endosome-  
523 associated transport vesicles. The nature of the NISP-associated vesicle was identified using cell  
524 biology molecular markers and FM4-64, which demonstrated that NISP is predominantly localized  
525 at TGN and in the early endosome (Fig 3), which was consistent with the localization of syntaxin-  
526 6 proteins in most eukaryotic cells [40]. As MP has been demonstrated to associate with the  
527 endosomal SYTA, a possible NISP sequestration of NSP-DNA into TGN/endosome-associated  
528 vesicles may provide the means for the predicted interactions between endosomally localized MP-  
529 SYTA and NSP-DNA, which would favor the MP-mediated intercellular transport of vDNA via  
530 an endocytic recycling pathway [35]. In summary, our data support a model in which direct  
531 interactions between the host factor NISP and NIG/NSP modulate vDNA intracellular trafficking  
532 to endosomes where MP, recruited by the endosomal SYTA, opportunistically interacts with NSP-  
533 vDNA to mediate the cell-to-cell movement of vDNA via plasmodesmata.

534

## 535 **Material and Methods**

536

### 537 **Phylogenetic analysis**

538 The amino acid full-length sequences of plant proteins were retrieved from TAIR  
539 (<http://arabidopsis.org/>), Phytozome v12 database (<https://phytozome.jgi.doe.gov/>) and amino acid  
540 full-length sequences of other species from the Ensemble database  
541 (<https://www.ensembl.org/index.html>). The syntaxin domain superfamily was predicted using the  
542 software HMMER v3.2.1 (<http://hmmer.org/>) using Pfam v.30 database (<https://pfam.xfam.org/>).  
543 The syntaxin domain-containing protein sequences were selected to perform the phylogenetic

544 reconstruction. The amino acid sequences were aligned using the MUSCLE algorithm [52].  
545 Phylogenetic trees were constructed using Bayesian Inference with MrBayes v3.2.2 [53] and mix  
546 model of amino acid substitution (Wag). The analyses were performed running 10.000.000  
547 generations and excluding the first 2.500.000 generations as burn-in and visualized with Figtree  
548 software (<http://tree.bio.ed.ac.uk/software/figtree/>). Plant NISP homologous proteins were  
549 identified using the BLAST algorithm implemented in the Ensemble and Phytozome databases.  
550 The amino acid sequences of the NISP homologs were selected for phylogenetic reconstruction of  
551 N-terminal Syntaxin-6 family using the same tools and criteria applied for the superfamily  
552 syntaxin. However, the amino acid substitution model Jones was used for the N-terminal Syntaxin-  
553 6 phylogenetic tree.

554

#### 555 **PPI network analysis**

556 NSP- and MP-interacting proteins from Arabidopsis were used as a query term to identify  
557 their respective interactions described in the BAR database (Bio-Analytic Resource for Plant  
558 Biology, <http://bar.utoronto.ca/interactions/>). The Biogrid and IntAct databases were selected for  
559 searching. The protein-protein interactions (PPI) were retrieved and imported into the Cytoscape  
560 software (<https://cytoscape.org/>) to visualize the topology of the PPI network and to calculate the  
561 network centrality metrics for each protein. The measured network centralities were betweenness,  
562 closeness, eccentricity, and degree. Briefly, the betweenness centrality in the PPI network of the  
563 graph  $G = (V,E)$  was calculated by observing the number of times a node  $v$  (protein) contributes  
564 as a link along the shorter paths among all nodes. The betweenness centrality of this node can be  
565 analyzed as:

$$\sum_{s,t \in V} \frac{\sigma(s,t|v)}{\sigma(s,t)}$$

566

567 where  $V$  is the total set of nodes,  $\sigma(s,t)$  is the number of shorter paths of  $(s,t)$ , and  $\sigma(s,t|v)$  is the  
568 number of paths crossing  $v$  [54]. The betweenness centrality can indicate the relevance of a protein  
569 as functionally capable of keeping together interacting proteins. Closeness centrality (of a node  $v$   
570 is the sum of the shortest path distances from  $w$  to all other nodes and calculated as described by  
571 Freeman [55]:

$$\frac{1}{\sum_{w \in V} dist(v, w)}$$

574  
575 A high closeness value can be determined by the fact that all nodes are usually close to node  $v$ .  
576 The eccentricity centrality of a node  $v$  is the maximum distance from  $v$  to all other nodes in graph  
577  $G$  and can be analyzed as described by Hage and Harary [56]:

$$\frac{1}{\max\{dist(v, w) : w \in V\}}$$

578  
579  
580  
581 In addition, the degree centrality of node  $v$  was calculated by  $\sum_{i=1}^K di$ , where  $d$  represents each  
582 adjacent node and  $K$ , the total number of adjacent nodes. Nodes with a high degree can be  
583 designated hubs and hold together different nodes with a lower degree.

#### 584 **GO analysis of the PPI network**

585 The gene set enrichment analysis (GSEA) of the proteins that compose the PPI network  
586 was performed using the Bioconductor GOSTats package [57]. GSEA analysis computes  
587 hypergeometric test  $p$  values for over- or underrepresentation for each GO term, and the annotation  
588 of genes is based on the Bioconductor annotation package `org.At.tair`.

589

## 590 **Plasmid constructions**

591 All recombinant plasmids were generated by the GATEWAY cloning system (Invitrogen,  
592 <http://www.invitrogen.com/>). The primers used for gene amplification are listed in S3 Table. The  
593 coding regions of *NISP* (AT4G30240) and AT2G18860, with or without a translational stop codon,  
594 were amplified from leaf cDNA of *Arabidopsis thaliana* ecotype Columbia (Col-0) and inserted  
595 into the entry vectors pDONR201 and pDONR207. The resulting clones were designated  
596 At4g30240-St-pDONR201 (pUFV2134), At4g30240-Ns-pDONR201 (pUFV2135), At2g18860-  
597 St-pDONR201 (pUFV3193), At2g18860-Ns-pDONR201 (pUFV3194), At4g30240-St-  
598 pDONR207 (pUFV2236), At4g30240-Ns-pDONR207 (pUFV2237), At2g18860-St- pDONR207  
599 (pUFV3195), At2g18860-Ns-pDONR207 (pUFV3196). Then, the DNA inserts were transferred  
600 by recombination from the entry vector to different yeast and plant expression vectors.

601 For the yeast two-hybrid assay, the *NISP* and AT2G18860 coding regions were transferred  
602 from the respective entry vectors (At4g30240-St-pDONR201 and At2g18860-St-pDONR201) to  
603 the yeast expression vectors pDEST32 and pDEST22, generated the clones At4g30240-St-  
604 pDEST32 (pUFV2141), At4g30240-St-pDEST22 (pUFV2142), At2g18860-St-pDEST32  
605 (pUFV3197) and At2g18860-St-pDEST22 (pUFV3198), fused to binding domain (BD)  
606 (pDEST32) or activation domain (AD) (pDEST22) of GAL4. The *NISP*- and *NIG*-derived clones  
607 used in the yeast two-hybrid assay have been previously described and designated NSP-St-  
608 pDEST32, NSP-C1-pDEST22 (Fontes *et al.*, 2004), and NIG-pDEST22 (pUFV2547; Calil *et al.*,  
609 2018).

610 For the subcellular localization experiments, the *NISP* and AT2G18860 coding region were  
611 fused to GFP and expressed in planta under the control of the CaMV 35S promoter in the vector

612 pK7FWG2. For the co-immunoprecipitation assay, in addition to the GFP fusion, *NISP* ORF was  
613 also fused to hemagglutinin (HA) tag, using the binary destination vector pK7m34GW for three  
614 fragment recombination. The resulting DNA constructions were At4g30240-pK7FWG2  
615 (pUFV2576), At2g18860-pK7FWG2 (pUFV3199) and 2x35S::At4g30240-Ns-6HA-pH7m34GW  
616 (pUFV2586).

617 For the subcellular co-localization assays, the ER-associated molecular marker ER-  
618 mCherry (CD-959), the TGN-associated molecular marker G-mCherry (CD-967) and the  
619 tonoplast-associated molecular marker vac-mCherry (CD-975) were obtained from the  
620 Arabidopsis Biological Resource Center. The plasma membrane-associated molecular marker,  
621 FLS2-mCherry was obtained by amplifying the *FLS2* ORF from Arabidopsis cDNA with the  
622 primers AtFLS2-Fwd and AtFLS2-NS-Rvs (S3 Table), inserting the amplified fragment by  
623 recombination into pDON207 and transferring it by triple recombination to the destination vector  
624 pH7m34GW along with FLS2-Ns-pDON207, pDONR-P4-P1R+2x35S, and pDONR-P2R-  
625 P3+mCherry, resulting in the clone FLS2-mCherry (pUFV3034). Likewise, the SYTA ORF was  
626 amplified from leaf cDNA with the primers AtSYTA-Fwd and AtSYTA-NS-Rvs (S3 Table),  
627 cloned into the entry vector pDONR-207 and transferred via triple recombination to the destination  
628 vector pH7m34GW along with SYTA-NspDON207, pDONR-P4-P1R+2x35S, and pDONR-P2R-  
629 P3+mCherry, generating SYTA-mCherry (pUFV3296).

630 The *NISP* coding region was also fused to GFP and expressed in plants under the control  
631 of its endogenous promoter. For this, about 2000 bp of 5' flanking sequence of At4g30240 was  
632 PCR-amplified using the primers described in S3 Table and cloned into pDONR-P4-P1R, yielding  
633 proAt4g30240-pDONR-P4-P1R (pUFV2436). Then, the 5' flanking sequence was transferred by  
634 triple recombination to the destination vector pK7Fm34GW along with At4g30240-Ns-pDON201,



635 proAt4g30240-pDONR-P4-P1R, and eGFP-pDONR-P2R-P3, resulting in the clone  
636 proAt4g30240::At4g30240-GFP (pUFV2849). The *NSP*- and *NIG*-derived clones used for co-  
637 immunoprecipitation assays have been previously described and designated as 2x35S-NSP-CI-  
638 6HA-pH7m34GW (pUFV2424), NSP-CI-pK7FWG2(pUFV2536), 2x35S-NIG-Ns-6HA-  
639 pH7m34GW (pUFV1946) and NIG- pK7FWG2 (pUFV1177) [48].

640 The SPYNE-GW and SPYCE-GW vectors, which contain the N-terminal (nYFP) and C-  
641 terminal (cYFP) of YFP, respectively, were used for the BiFC experiments. At4g30240-Ns-  
642 pDONR207 was transferred to SPYNE-GW and SPYCE-GW, yielding At4g30240-Ns-SPYNE  
643 (pUFV2238) and At4g30240-Ns-SPYCE (pUFV2239). The *NSP*- and *NIG*-derived clones used in  
644 the BiFC assays have been previously described and designated as NSP-CI-Ns-SPYNE  
645 (pUFV1654), NSP-CI-Ns-SPYCE (pUFV1655), NIG-Ns-SPYNE (pUFV1646), and NIG-Ns-  
646 SPYCE (pUFV1647) [48].

647 NISP truncated versions were obtained from At4g30240-St-pDONR201 by PCR using  
648 primers listed in S3 Table. The generated fragments were cloned into the entry vector pDONR201  
649 and designated as At4g30240(1-107)-St-pDONR201 (pUFV2806), At4g30240(105-200)-St-  
650 pDONR201 (pUFV2807) and At4g30240(200-300)-St-pDONR201 (pUFV2808). The respective  
651 DNA inserts were then transferred to the yeast expression vectors, yielding At4g30240(1-107)-St-  
652 pDEST32 (pUFV2822), At4g30240(1-107)-St-pDEST22 (pUFV2819), At4g30240(105-200)-St-  
653 pDEST32 (pUFV2823), At4g30240(105-200)-St-pDEST22 (pUFV2820), At4g30240(200-200)-  
654 St-pDEST32 (pUFV2824) and At4g30240(200-300)-St-pDEST22 (pUFV2821).

655

656 **Detecting MP- and NSP-host protein interactions on high-density halo tag-NAPPAs**

657           The identification of NSP and MP partners was carried out through a previously fabricated  
658 high-density HaloTag nucleic acid programmable protein array (HaloTag-NAPPA), as described  
659 by Yazaki *et al.* [37]. The protein microarray, which consisted of a set of *in situ* synthesized  
660 proteins from 4600 *Arabidopsis thaliana* ORFs, has been designated AtNAPPA01. 3×HA-fused  
661 CabLCV MP and NSP proteins were independently expressed using the TNT system (Promega)  
662 according to the manufacturer's recommendations. The *in vitro* synthesized HA-fused MP, and  
663 HA-fused NSP were used to probe individually AtNAPPA01. The identification of MP- and NSP-  
664 interacting proteins with the NAPPA protein-protein interaction method was from a single  
665 experiment using duplicated spots on one glass slide. Interactions were considered positive only  
666 when both replicated spots displayed normalized signal intensity above background. Experiments,  
667 data scanning, quantification, and data processing were carried out as described by Yazaki *et al.*  
668 [37].

669

#### 670 **Plant growth conditions and transformation**

671           *Arabidopsis thaliana*, ecotype Columbia (Col-0), was used as the wild type. Homozygous  
672 seeds from the T-DNA insertional mutants *nisp-1* (Salk\_117751) and *at2g18860-1* (Salk\_099699)  
673 were obtained from the Arabidopsis Biological Resource Center. Arabidopsis seeds were surface-  
674 sterilized and cold treated at 4°C for 72 h in the dark and then exposed to white light. Seedlings  
675 were grown at 22°C on plates containing Murashige-Skoog (MS) medium for 2 weeks and then  
676 transferred to soil. Plants were grown in a growth chamber at 22 °C under short-day conditions  
677 (12h light/12h dark). Transgenic lines were obtained via *A. tumefaciens*-mediated transformation  
678 using the floral dip method [58]. Transformed plants with the indicated DNA constructions were  
679 selected in MS medium supplemented with the appropriate antibiotic (kanamycin, pK7FWG2).

680 Selected transformants were confirmed by PCR, transferred to soil, and grown in a growth  
681 chamber at 22 °C under long-day conditions (16h light/8h dark) to generate seeds. For segregation  
682 analysis, seeds were germinated on MS medium containing 50 µg mL<sup>-1</sup> kanamycin. Homozygous  
683 T1 lines for the T-DNA loci were selected by determining the frequency of their kanamycin-  
684 resistant T2 seeds after self-pollination. Accumulation of NISP-GFP and AT2g18860-GFP  
685 transcript and protein levels were monitored in each generation by qRT-PCR using gene-specific  
686 primers (S3 Table) and immunoblotting using anti-GFP antibody. From the independently  
687 transformed lines (8-15 lines of each construct and genotype transformed), we selected three  
688 independently transformed lines which appeared to have an integrated T-DNA locus on a single  
689 chromosome, since 75% of their T1 segregating seedlings were resistant to kanamycin (S4 Table).  
690 The selected lines are presented in S4 Table. The nomenclature *nisp-1*/NISP-1-3 indicates that the  
691 genotype *nisp-1* was transformed with At4g30240-pK7FWG2, harboring the *NISP* ORF fused to  
692 the N-terminus of GFP under the control of the 35S promoter to generate NISP-complementing  
693 lines. The designations AtNISP-1, AtNISP-2 and AtNISP-3 indicate three independently  
694 transformed lines, which were generated by transformation of Col-0 with At4g30240-pK7FWG2  
695 to obtain NISP-GFP-overexpressing lines. The same nomenclature was applied for the  
696 transformation of *at2g18860-1* mutant and Col-0 with At2g18860-pK7FWG2, containing the  
697 At2g18860 ORF fused to the N-terminus of GFP under the control of 35S promoter (S4 Table).

698

### 699 **RNA isolation and qRT-PCR analysis**

700 Primers were designed using the Primer Express 3.0 (Life Technologies). Total RNA was  
701 extracted from Arabidopsis leaves using TRIzol reagent (Thermo Fisher Scientific) and quantified  
702 with a NanoDrop spectrophotometer. Total RNA (2 µg) was treated with RNase-free DNase I and

703 reverse transcribed using oligo (dT) (0,5  $\mu$ M) and 1U of M-MLV (Thermo). Real-time RT-PCR  
704 was carried out using SYBR Green PCR Master Mix (Life Technologies), DNA template, and  
705 primers in 10  $\mu$ L of reaction and an ABI7500 real-time PCR system (Life Technologies). The  
706 expression of each gene was normalized to the expression of *Actin* and quantified using the  $2^{-\Delta Ct}$   
707 method. The primers used to detect specific transcripts with real-time RT-PCR are listed in S3  
708 Table.

709

### 710 **Yeast two-hybrid assay**

711 Competent cells of *Saccharomyces cerevisiae*, strain AH109 (MATa, *trp1-901*, *leu2-3*,  
712 *112*, *ura3-52*, *his3-200*, *gal4 $\Delta$* , *gal80 $\Delta$* , *LYS2::GAL1UAS-GAL1TATA-HIS3*, *GAL2UAS-*  
713 *GAL2TATA-ADE2*, *URA3::MEL1UAS-MEL1 TATA-lacZ*), were cotransformed with the yeast  
714 expression vectors pDEST22 (Gal4 AD) and pDEST32 (Gal4 BD), carrying the coding region of  
715 the tested proteins, along with 100  $\mu$ g of salmon sperm carrier DNA (ssDNA), using the lithium  
716 acetate/polyethylene glycol (PEG) method. For the selection of double transformants, the cells  
717 were plated on medium deficient in leucine and tryptophan (SD, Synthetic Dropout, -Leu, -Trp)  
718 and cultured for 4 days at 28°C. Interactions were monitored by the ability of the reporter strain to  
719 grow on media lacking leucine, tryptophan, and histidine but supplemented with 2.5 mM 3-AT (3-  
720 Amino-1,2,4-triazole; Sigma) for 4 days at 28°C.

721

### 722 **Co-immunoprecipitation assay**

723 The *in vivo* interactions between NISP and NSP or NIG were monitored by co-  
724 immunoprecipitation using the  $\mu$ MACS™ Epitope Tag Protein Isolation (MACS/Miltenyl Biotec)  
725 kit, according to manufacturer's recommendations. *Agrobacterium tumefaciens* (strain *GV3101*)-

726 mediated transient expression in *N. benthamiana* leaves was carried out as described (12). Total  
727 protein extracts were obtained from infiltrated leaves expressing the recombinant proteins. At 48  
728 h after agro-infiltration, 200 mg of leaves were homogenized with 1 ml of lysis buffer (50 mM  
729 Tris-HCl pH 8.0, 1 mM PMSF, 2mM benzamidine, 1% (v/v) Nonidet P-40) and incubated for 2 h  
730 with anti-green fluorescent protein (GFP) magnetic beads (MACS / Miltenyi Biotec) at 4 °C under  
731 rotation. After incubation, the extracts were applied to a MACS column for the indicated protein  
732 tag, washed five times before elution with a pre-heated buffer at 95 °C. The immunoprecipitated  
733 proteins were separated by sodium dodecyl sulfate- polyacrylamide gel electrophoresis (SDS-  
734 PAGE) 10% (p/v), immunoblotted with the monoclonal antibodies anti-human influenza  
735 hemagglutinin (anti-HA) epitope tag, amino acids 98-106 (Miltenyi Biotec, 130-091-972;  
736 1:10.000) or anti-GFP (Miltenyi Biotec, 130-091-833; 1:10.000), and detected using Signal West  
737 Pico Chemiluminescent Substrate (Thermo Scientific) according to the recommendations of the  
738 manufacturer.

739

#### 740 **Bimolecular fluorescence complementation (BiFC) assay**

741 Different combinations of *A. tumefaciens* strain GV3101 expressing the indicated proteins  
742 fused to N-YFP/C-YFP were co-infiltrated into the abaxial surface of *N. benthamiana* leaves at  
743 OD<sub>600nm</sub> of 1:1 proportion. Three days after infiltration, fluorescence was examined in epidermal  
744 cells using a Zeiss inverted 510 META laser scanning microscope equipped with an argon laser  
745 and a helium laser as excitation sources. YFP was excited at 514 nm using the argon laser, and  
746 YFP emission was detected using a 560–615-nm filter. The images were processed using LSM  
747 Image Browser 4 (ZEISS) software.

748

749 **Subcellular localization**

750 The subcellular localization of proteins was examined in epidermal cells of *N. benthamiana*  
751 leaves transiently expressing GFP fusions. Briefly, *N. benthamiana* leaves were agro-infiltrated  
752 with *A. tumefaciens* strain GV3101 carrying proAt4g30240-pDONR-P4-P1R (pUFV2436),  
753 At4g30240-pK7FWG2 (pUFV2576) or At2g18860-pK7FWG2 (pUFV3199) (Method S1) and  
754 fluorescence of the GFP fusions were visualized in epidermal cells 3 days after infiltration by  
755 confocal microscopy using a Zeiss inverted 510 META laser scanning microscope equipped with  
756 an argon laser and a helium laser as excitation sources. GFP was excited by the argon/helium-neon  
757 laser system in 488 nm wavelength, and emission was collected in 500–530 nm band-pass filter.  
758 Images were captured and processed with LSM Image Browser 4 (Carl-Zeiss) software.

759 For co-localization assays, NISP-GFP was co-expressed with ER-, Golgi-, tonoplast-,  
760 plasma membrane- and endosome-associated molecular markers fused to mCherry (see in plasmid  
761 constructions) and fluorescence was examined by confocal microscopy, using a Zeiss inverted  
762 LSM510 META laser scanning microscope, on whose system, the default scanning mode is  
763 sequential scanning (multitrack mode). For imaging GFP, the 488 nm excitation line and the 500  
764 to 530 nm band pass filter were used. Excitation of mCherry was at 540 nm and emission of 608-  
765 680 nm. For the FM4-64 staining, 48 h after agro-infiltration with the DNA construct expressing  
766 NISP-GFP, the leaves were infiltrated with a solution of 50  $\mu$ M FM4-64 (Molecular Probes,  
767 Eugene, OR) and examined by confocal microscopy 1h post-infiltration.

768

769 **Infectivity assay**

770 The generation of transgenic lines overexpressing NISP (AtNISp) and At2g18860  
771 (AT2G18860), knockout lines (*nisp-1* and *at2g18860-1*), NISP complementing lines are described

772 in Method S1. Transgenic lines and Columbia at the seven-leaf stage were inoculated with  
773 plasmids containing partial tandem repeats of CabLCV DNA-A and DNA-B by biolistic delivery  
774 using a microprojectile bombardment model PDS-1000/He accelerator at 900 psi. (24, 26, 59). The  
775 inoculated plants were transferred to a growth chamber and monitored for symptoms development  
776 and progress of infection [23, 60]. Total DNA was extracted from systemically infected leaves  
777 [61], and viral DNA accumulation was detected by PCR using universal DNA-B specific primers  
778 PBL1v2040 and PCRC1 [62] (S3 Table). In each experiment, 15 plants of each line were  
779 inoculated with 2 µg of tandemly repeated DNA-A plus DNA-B per plant. The course of infection  
780 was examined using data from three independent experiments.

781

## 782 **Quantification of viral DNA in infected plants**

783 The accumulation of viral DNA in infected plants was quantified by qPCR [26]. The  
784 reactions were prepared in 10 µL using SYBR Green Master Mix (Life Technologies), 100 ng of  
785 total DNA from systemically infected leaves, and CabLCV-DNA-B-specific primers (S3 Table),  
786 and analyzed on a real-time PCR system. The genomic copies of CabLCV were normalized against  
787 an internal control (18S rRNA) to account for template input variation between tubes. For viral  
788 DNA quantification, standard curves were prepared using serial dilutions of DNA-B of CabLCV  
789 (100 to 10<sup>6</sup> copies of viral genome per reaction).

790

## 791 **Formaldehyde fixation and immunoprecipitation of NISP-GFP:vDNA complexes**

792 A modified ChIP assay evaluated the in vivo interaction between NISP and viral DNA.  
793 NISP-overexpressing transgenic lines (AtNIS) and Columbia (Col-0) at the six-leaf stage were  
794 inoculated by biolistic delivery with CabLCV DNA-A and DNA-B infectious clones. Tissue

795 harvest, formaldehyde fixation, and chromatin breaks from 45 days-old infected plants were  
796 conducted according to Alves et al. [63] and Yamaguchi et al. [64]. For cross-linking proteins to  
797 DNA with formaldehyde, 600 mg of infected leaves were washed with 10 mL of PBS (10 mM  
798 Na<sub>2</sub>HPO<sub>4</sub>, 1.8 mM KH<sub>2</sub>PO<sub>4</sub>, 137 mM NaCl, 2.7 mM KCl, pH 7.4) and fixed in 10 mL PBS by  
799 adding formaldehyde to 1% final concentration. The infiltration of formaldehyde into vegetable  
800 cells was carried out under vacuum at -500 Pa for 1.5 min, then 1 min twice with 30 s intervals.  
801 After washing first with 0.125 M glycine under vacuum for 1.5 min and then with PBS, the tissue  
802 was air-dried. The fixed samples were homogenized in liquid N<sub>2</sub> and 1 mL of extraction buffer  
803 (50 mM Tris-HCl pH 8.0, 10 mM EDTA, 1% (v/v) Nonidet-P40). After incubation for 30 min on  
804 ice, cell debris was removed by centrifugation at 12000 x g for 10 min. The supernatant (300 µL)  
805 was diluted with 700 µL of the CHIP dilution buffer (16.7 mM Tris-HCl pH 8.0, 167 mM NaCl,  
806 1.2 mM EDTA, 0.01% SDS) and DNA was fragmented by sonication at an 80 µm amplitude level,  
807 six pulses for 30 min, 30 s on/off on the ice. Then, 700 µL of the sonicated suspension was mixed  
808 with 200 µL of the CHIP dilution buffer, supplemented with 1.1% (v/v) Triton X-100 and  
809 centrifuged at 13200 x g for 5 min at 4° C. The supernatant was incubated with 50 µL of protein-  
810 A-garose beads for 2 h. After centrifugation at 900 x g for 3 min, 18 µL of the supernatant were  
811 stored at -80° C, as input control. The remaining supernatant was incubated with 1 µL of polyclonal  
812 anti-GFP serum (Life Technologies A11122; 3x diluted) for 4h at 4° C. Anti-GFP-NISP-  
813 GFP:vDNA complexes were captured by incubation with 50 µL of protein-A-garose beads for 4 h  
814 at 4°C, under gentle agitation. After centrifugation at 900 x g for 3min, the pellet was washed five  
815 times with different washing buffers in the order: twice with the washing buffer A (0.1% (w/v)  
816 SDS 1% (v/v) Triton X-100, 2 mM EDTA, 20 mM Tris-HCl, pH 8.1, 150 mM NaCl), once with  
817 the buffer B (0.1% (w/v) SDS 1% (v/v) Triton X-100, 2 mM EDTA, 20 mM Tris-HCl, pH 8.1,



818 500 mM NaCl), followed by the buffer C (250 mM LiCl, 1% (v/v) IGEPAL-CA630, 1% (w/v)  
819 sodium deoxycholate, 1 mM EDTA, 10 mM Tris-HCl pH 8,1) and finally with 0,5 X TE (10 mM  
820 Tris-HCl pH 8,0, 1 M EDTA). The DNA pellet was reverse cross-linked from proteins and purified  
821 using the QIAprep® Spin Miniprep kit.

822

### 823 **ChIP-qPCR**

824 NSP primers (S3 Table) were initially used to amplify viral DNA-B from the  
825 immunoprecipitated DNA and input DNA to ensure DNA-B-specific amplification in samples.  
826 Likewise, DNA-A-specific primers were used to examine initial amplification of the DNA-A  
827 component. Each reaction contained 1 µL of immunoprecipitated DNA or 20-fold diluted input  
828 DNA, 0.2 mM CabLCV-DNA-B-specific primers (S3 Table), and 5 µL of SYBR Green PCR  
829 Master Mix (Life Technologies) in 10 µL total volume. The thermal cycling conditions of the  
830 reactions consisted of an initial step at 95°C for 10 min, followed by 40 cycles at 94°C for 15 s  
831 and 58°C for 45 s. The cycle threshold (Ct) values from Col-0 and AtNISP were normalized with  
832 the Ct values of the respective inputs, and the results were expressed as a percentage of the input.

833

### 834 **Author Contribution**

835 B.C.G.M performed most of the experiments; L.G.C.M. performed the co-localization  
836 experiments and protein localization assays; M.D.-B., A.Y.K. and J.Y. performed protein  
837 microarray assay; B.C.G.M. and J.P.B.M. performed two hybrid assays; J.C.F.S. performed *in*  
838 *silico* and statistical analyses; B.C.G.M. and A.A.S. performed BiFC assays; E.P.B.F. and J.R.E.  
839 conceived experiments; B.C.G.M. and E.P.B.F. designed all experiments, analyzed the data and  
840 wrote the manuscript.

841

## 842 **Acknowledgments**

843 The authors are grateful to the microscopy facility at Universidade Federal de Viçosa.

844

## 845 **Funding**

846 We are grateful to the Brazilian funding agencies CAPES, CNPq, FAPEMIG, and the National  
847 Institute of Science and Technology in Plant-Pest interactions for supporting this study.

848

## 849 **Competing interests**

850

851 The authors have declared that no competing interests exist.

852

## 853 **References**

854 1. Dodding MP, Way M. Coupling viruses to dynein and kinesin-1. *EMBO J.* 2011;30: 3527-3539.

855 2. Schoelz JE, Harries PA, Nelson RS. Intracellular transport of plant viruses: finding the door out  
856 of the cell. *Mol Plant.* 2011;4: 813-831.

857 3. Harries PA, Schoelz JE, Nelson RS. Intracellular Transport of Viruses and Their Components:  
858 Utilizing the Cytoskeleton and Membrane Highways. *Mol Plant-Microbe Interac.* 2010;23: 1381-  
859 1393.

860 4. Wolf S, Deom CM, Beachy RN, Lucas WJ. Movement protein of tobacco mosaic virus modifies  
861 plasmodesmatal size exclusion limit. *Science.* 1989;246: 377-379.

862 5. Arriagada G. Retroviruses and microtubule-associated motor proteins. *Cell Microbiol.* 2017;19:  
863 e12759.

864 6. Rojas MR, Macedo MA, Maliano MR, Soto-Aguilar M, Souza JO, Briddon RW, et al. World  
865 Management of Geminiviruses. *Ann Rev Phytopathol.* 2018;56: 637-677.

- 866 7. Hanley-Bowdoin L, Bejarano ER, Robertson D, Mansoor S. Geminiviruses: masters at  
867 redirecting and reprogramming plant processes. *Nat Ver Microbiol.* 2013;11: 777-788.
- 868 8. Silva JCF, Carvalho TFM, Basso MF, Deguchi M, Pereira WA, Sobrinho RR, et al. Geminivirus  
869 data warehouse: a database enriched with machine learning approaches. *BMC Bioinformatics.*  
870 2017;18: 240.
- 871 9. Pascal E, Sanderfoot AA, Ward BM, Medville R, Turgeon R, Lazarowitz SG. The geminivirus  
872 BR1 movement protein binds single-stranded DNA and localizes to the cell nucleus. *Plant Cell.*  
873 1994;6: 995-1006.
- 874 10. Rojas MR, Noueiry AO, Lucas WJ, Gilbertson RL. Bean dwarf mosaic geminivirus movement  
875 proteins recognize DNA in a form- and size-specific manner. *Cell.* 1998;95: 105-113.
- 876 11. Hehnle S, Wege C, Jeske H. Interaction of DNA with the movement proteins of geminiviruses  
877 revisited. *J Virol.* 2004;78: 7698-7706.
- 878 12. Carvalho CM, Fontenelle MR, Florentino, LH, Santos AA, Zerbini FM, Fontes EPB. A novel  
879 nucleocytoplasmic traffic GTPase identified as a functional target of the bipartite geminivirus  
880 nuclear shuttle protein. *Plant J.* 2008a;5: 869-880.
- 881 13. Sanderfoot AA, Lazarowitz SG. Cooperation in viral movement: The geminivirus BL1  
882 movement protein interacts with BR1 and redirects it from the nucleus to the cell periphery. *Plant*  
883 *Cell.* 1995;7: 1185-1194.
- 884 14. Noueiry AO, Lucas WJ, Gilbertson RL. Two proteins of a plant DNA virus coordinate nuclear  
885 and plasmodesmatal transport. *Cell.* 1994;76: 925-932.
- 886 15. Lazarowitz SG, Beachy RN. Viral movement proteins as probes for intracellular and  
887 intercellular trafficking in plants. *Plant Cell.* 1999;11: 535-548.

- 888 16. Ward BM, Lazarowitz SG. Nuclear export in plants: use of geminivirus movement proteins  
889 for a cell-based export assay. *Plant Cell*. 1999;11: 1267-1276.
- 890 17. Gafni Y, Epel BL. The role of host and viral proteins in intra and inter-cellular trafficking of  
891 geminiviruses. *Physiol Mol Plant Pathol*. 2002;60: 231-241.
- 892 18. Carvalho CM, Machado JP, Zerbini FM, Fontes EP. NSP-interacting GTPase: a cytosolic  
893 protein as cofactor for nuclear shuttle proteins. *Plant Signal Behav*. 2008b;3: 752-754.
- 894 19. Sanchez-Velar N, Udofia EB, Yu Z, Zapp ML. hRIP, a cellular cofactor for Rev function,  
895 promotes release of HIV RNAs from the perinuclear region. *Genes Dev*. 2004;18:23-34.
- 896 20. Zhou Y, Rojas MR, Park M-R, Seo YS, Lucas WJ, Gilbertson RL. Histone H3 interacts and  
897 colocalizes with the nuclear shuttle protein and the movement protein of a geminivirus. *J Virol*.  
898 2011;85: 11821-11832.
- 899 21. McGarry RC, Barron YD, Carvalho MF, Hill JE, Gold D, Cheung E, et al. A novel Arabidopsis  
900 acetyltransferase interacts with the geminivirus movement protein NSP. *Plant Cell*. 2003;15: 1605-  
901 1618.
- 902 22. Carvalho MF, Lazarowitz SG. Interaction of the movement protein NSP and the Arabidopsis  
903 acetyltransferase AtNSI is necessary infection and pathogenicity. *J Virol*. 2004;78: 11161-11171.
- 904 23. Florentino LH, Santos AA, Fontenelle MR, Pinheiro GL, Zerbini FM, Baracat-Pereira MC, et  
905 al. A PERK-Like receptor kinase interacts with the geminivirus nuclear shuttle protein and  
906 potentiates viral infection. *J Virol*. 2006;80: 6648-6656.
- 907 24. Fontes EPB, Santos AA, Luz DF, Waclawovsky AJ, Chory J. The geminivirus nuclear shuttle  
908 protein is a virulence factor that suppresses transmembrane receptor kinase activity. *Genes Dev*.  
909 2004;18: 2545-2556.

- 910 25. Carvalho CM, Santos AA, Pires SR, Rocha CS, Saraiva DI, Machado JPB, et al. Regulated  
911 nuclear trafficking of rpL10A mediated by NIK1 represents a defense strategy of plant cells against  
912 virus. *PLoS Pathog.* 2008c;4: e1000247.
- 913 26. Zorzatto C, Machado JPB, Lopes KVG, Nascimento KJT, Pereira WA, Brustolini OJB, et al.  
914 NIK1-mediated translation suppression functions as a plant antiviral immunity mechanism.  
915 *Nature.* 2015;520: 679-682.
- 916 27. Sanderfoot AA, Ingham DJ, Lazarowitz SG. A viral movement protein as a nuclear shuttle.  
917 The geminivirus BR1 movement protein contains domains essential for interaction with BL1 and  
918 nuclear localization. *Plant Physiol.* 1996;110: 23-33.
- 919 28. Sanderfoot AA., Lazarowitz SG. Getting it together in plant virus movement: cooperative  
920 interactions between bipartite geminivirus movement proteins. *Trends Cell Biol.* 1996;6: 353-358.
- 921 29. Ward BM, Medville E, Lazarowitz SG, Turgeon R. The geminivirus BL1 movement protein  
922 is associated with endoplasmic reticu- lum-derived tubules in developing phloem cells. *J Virol.*  
923 1997;71: 3726-3733.
- 924 30. Zhang SC, Wege C, Jeske H. Movement proteins (BC1 and BV1) of Abutilon mosaic  
925 geminivirus are cotransported in and between cells of sink but not of source leaves as detected by  
926 green fluorescent protein tagging. *Virology.* 2001;290: 249-260.
- 927 31. Aberle HJ, Rütz ML, Karayavuz M, Frischmuth S, Wege C, Hülser D, et al. Localizing BC1  
928 movement proteins of Abutilon mosaic geminivirus in yeasts by subcellular fractionation and  
929 freeze-fracture immunolabelling. *Arch Virol.* 2002;147:103-107.
- 930 32. Frischmuth S, Wege C, Hülser D, Jeske H. The movement protein BC1 promotes redirection  
931 of the nuclear shuttle protein BV1 of Abutilon mosaic geminivirus to the plasma membrane in  
932 fission yeast. *Protoplasma.* 2007;230:117-123.

- 933 33. Krenz B, Windeisen V, Wege C, Jeske H, Kleinow T. A plastid-targeted heat shock cognate  
934 70 kDa protein interacts with the Abutilon mosaic virus movement protein. *Virology*. 2010;401:6-  
935 17.
- 936 34. Krenz B, Jeske H, Kleinow T. The induction of stromule formation by a plant DNA-virus in  
937 epidermal leaf tissues suggests a novel intra- and intercellular macromolecular trafficking route.  
938 *Front Plant Sci*. 2012;3: 291.
- 939 35. Lewis JD, Lazarowitz SG. *Arabidopsis* synaptotagmin SYTA regulates endocytosis and virus  
940 movement protein cell-to-cell transport. *Proc Natl Acad Sci, USA*. 2010;107: 2491-2496.
- 941 36. Krapp S, Schuy C, Greiner E, Stephan I, Alberter B, Funk C, et al. Begomoviral movement  
942 protein effects in human and plant cells: towards new potential interaction partners. *Viruses*.  
943 2017;9: 334.
- 944 37. Yazaki J, Galli M, Kim AY, Nito K, Aleman F, Chang KN, et al. Mapping transcription factor  
945 interactome networks using HaloTag protein arrays. *Proc Natl Acad Sci, USA*. 2016;113: e4238-  
946 47
- 947 38. Alcaide-Loridan C, Jupin I. Ubiquitin and plant viruses, let's play together! *Plant Physiol*.  
948 2012;160: 72-82.
- 949 39. Conchon S, Cao X, Barlowe C, Pelham HR. Got1p and Sft2p: membrane proteins involved in  
950 traffic to the Golgi complex. *EMBO J*. 1999;18: 3934-3946.
- 951 40. Jung JJ, Inamdar SM, Tiwari A, Choudhury A. Regulation of intracellular membrane  
952 trafficking and cell dynamics by syntaxin-6. *Biosci Rep*. 2012;32: 383-391.
- 953 41. Drakakaki G, van de Ven W, Pan S, Miao Y, Wang J, Keinath NF, et al. Isolation and proteomic  
954 analysis of the SYP61 compartment reveal its role in exocytic trafficking in *Arabidopsis*. *Cell Res*.  
955 2012;22: 413-424.

- 956 42. Zhourar J, Rojo E, Bassham DC. AtVPS45 Is a Positive Regulator of the SYP41/SYP61/VTI12  
957 SNARE Complex Involved in Trafficking of Vacuolar Cargo. *Plant Physiol.* 2009;149: 1668-  
958 1678.
- 959 43. Hachez C, Laloux T, Reinhardt H, Cavez D, Degand H, Grefen C, et al. Arabidopsis SNAREs  
960 SYP61 and SYP121 coordinate the trafficking of plasma membrane aquaporin PIP2;7 to modulate  
961 the cell membrane water permeability. *Plant Cell.* 2014;26: 3132-3147.
- 962 44. Reverter M, Rentero C, Garcia-Melero A, Hoque M, Vilà de Muga S, Alvarez-Guaita, A et al.  
963 Cholesterol regulates Syntaxin 6 trafficking at trans-Golgi network endosomal boundaries. *Cell*  
964 *Rep.* 2014;7: 883-97
- 965 45. Robatzek S, Chinchilla D, Boller T. Ligand-induced endocytosis of the pattern recognition  
966 receptor FLS2 in Arabidopsis. *Genes Dev.* 2006;20: 537-542.
- 967 46. Nelson BK, Cai X, Nebenfuhr A. A multicolored set of in vivo organelle markers for co-  
968 localization studies in Arabidopsis and other plants. *Plant J.* 2007;51: 1126-1136.
- 969 47. Haupt S, Cowan GH, Ziegler A, Roberts AG, Oparka KL, Torrance L. Two Plant–Viral  
970 Movement Proteins Traffic in the Endocytic Recycling Pathway. *Plant Cell.* 2005;17: 164-181.
- 971 48. Calil IP, Quadros IPS, Araújo TC, Duarte CEM, Gouveia-Mageste BC, Silva JCF, et al. A  
972 WW Domain-Containing Protein Forms Immune Nuclear Bodies against Begomoviruses. *Mol*  
973 *Plant.* 2018;11: 1449-1465.
- 974 49. Wang T, Li L, Hong W. SNARE proteins in membrane trafficking. *Traffic.* 2017;18:767-775.
- 975 50. Zhourar, J., Rojo, E., and Bassham, D.C. (2009). AtVPS45 Is a Positive Regulator of the  
976 SYP41/SYP61/VTI12 SNARE Complex Involved in Trafficking of Vacuolar Cargo. *Plant*  
977 *Physiol.* 149: 1668-1678.
- 978 51. Jahn R, Scheller RH. SNAREs—Engines for membrane fusion. *Nat Rev Mol Cell Biol.* 2006;7:  
979 631-643.

- 980 52. Edgar RC. MUSCLE: multiple sequence alignment with high accuracy and high throughput.  
981 Nucleic Acids Res. 2004;32(5): 1792-1797.
- 982 53. Ronquist F, Huelsenbeck JP. MrBayes 3: Bayesian phylogenetic inference under mixed  
983 models. Bioinformatics. 2003;19: 1572-1574.
- 984 54. Brandes U. A faster algorithm for betweenness centrality. J Mathem Sociol. 2001;25: 163-177.
- 985 55. Freeman LC. Centrality in social networks conceptual clarification. Social Networks. 1978;1:  
986 215-239.
- 987 56. Hage P, Harary F. Eccentricity and centrality in networks. Social Networks. 1995;17: 57-63.
- 988 57. Falcon S, Gentleman R. Using GOstats to test gene lists for GO term association.  
989 Bioinformatics. 2007;23: 257–258.
- 990 58. Zhang X, Henriques R, Lin SS, Niu QW, Chua NH. Agrobacterium-mediated transformation  
991 of Arabidopsis thaliana using the floral-dip method. Nat Protoc. 2006;1: 641-646.
- 992 59. Santos AA, Carvalho CM, Florentino LH, Ramos JJO, Fontes EPB. Conserved threonine  
993 residues within the A-loop of the receptor NIK differentially regulate the kinase function required  
994 for antiviral signaling. PLoS ONE. 2009;4: e5781.
- 995 60. Rocha CS, Santos AA, Machado JPB, Fontes EPB. The ribosomal protein L10/QM-like protein  
996 is a component of the NIK-mediated antiviral signaling. Virology. 2008;380: 165–169.
- 997 61. Dellaporta SL, Wood J, Hicks JB. 1983. A plant DNA miniprep: version II. Plant Mol  
998 Biol Rep. 1983;1: 19-23.
- 999 62. Rojas MR, Gilbertson RL, Russel DR, Maxwell DP. Use of degenerate primers in the  
1000 polymerase chain reaction to detect whitefly-transmitted geminiviruses. Plant Dis. 1993;77: 340-  
1001 347.



1002 63. Alves MS, Reis PAB, Dadalto SP, Faria JAQA, Fontes EPB, Fietto LG. A Novel Transcription  
1003 Factor, ERD15 (Early Responsive to Dehydration 15), Connects Endoplasmic Reticulum Stress  
1004 with an Osmotic Stress-induced Cell Death Signal. *J Biol Chem.* 2011;286: 20020-20030.

1005 64. Yamaguchi N, Winter CM, Wu MF, Kwon CS, William DA, Wagner D. Protocols: chromatin  
1006 immunoprecipitation from Arabidopsis tissues. *Arabidopsis Book.* 2014;12: e0170.

1007

## 1008 **Figure Legends**

1009

1010 **Fig 1. MP-NSP-Arabidopsis protein-protein interactions (PPI) network**  
1011 **integrated into Arabidopsis interactome.**

1012 The network displays a firework topology, which was assembled by the Cytoscape software. The  
1013 viral proteins, MP and NSP, are represented in red. The NSP-specifically interacting proteins are  
1014 in dark orange and connecting proteins from Arabidopsis in light orange. The MP-specifically  
1015 interacting proteins are indicated in light yellow to which interacting dark yellow proteins  
1016 converge. Arabidopsis proteins that interact with both MP and NSP are shown in green, forming  
1017 hubs of convergent blue proteins. Gray proteins represent connecting points between two  
1018 functionally similar hubs.

1019

1020 **Fig 2. NISP, but not AT2G18860, interacts with NSP via the Syntaxin-6 domain.**

1021 **(A)** Schematic representation of NISP and AT2G18860 sequence alignment. The syntaxin-6  
1022 domain is indicated in green and the transmembrane segment, in red. The identity of sequence and  
1023 positions of amino acid residues are indicated. Sequence alignment was performed with  
1024 CLUSTAL OMEGA. **(B)** NISP and NSP interact in yeast. NISP and NSP fused to the activation

1025 domain (AD), and binding domain (BD) of Gal4 and also in combination with empty vectors were  
1026 expressed in yeast. The interactions between the tested proteins were monitored by histidine  
1027 prototrophy in medium supplemented with 3-AT for 4 days at 28°C. (C) AT2G18860 failed to  
1028 interact with NSP in yeast. AT2G18860 and NSP fused to both Gal4AD and BD were expressed  
1029 in yeast, and possible interactions were assayed in all combinations. Co-expressed NSP-BD and  
1030 NISP-AD were used as a positive control. (D-F). Mapping the NSP-binding domain on NISP.  
1031 Yeast cells expressing the indicated truncated version of NISP and NSP fusions were plated on  
1032 selective medium lacking leucine, tryptophan, and histidine and supplemented with 2.5 mM 3-AT  
1033 and grown for 4 days at 28°C. The truncated versions of NISP are delimited by the indicated  
1034 position of the amino acid residues in the full-length protein. Protein interaction was only observed  
1035 by co-expressing AD-NISP<sup>1-107</sup> and BD-NSP.

1036

### 1037 **Fig 3. Subcellular localization of NISP.**

1038 (A) The NISP-GFP distribution in intracellular vesicles. *N. benthamiana* leaves were infiltrated  
1039 with *A. tumefaciens* carrying a DNA construct expressing NISP-GFP under the control of 35S  
1040 promoter. Confocal images from three independent experiments were taken 36 hours post-  
1041 infiltration. Approximately 200 cells were examined. Scale bars, 10 µm and 20 µm. (B) Confocal  
1042 images of NISP-GFP transiently expressed under the control of the endogenous promoter. Scale  
1043 bars, 10 µm and 20 µm. (C) Co-expression of the ER-associated ER-mCherry molecular marker  
1044 and NISP-GFP in *N. benthamiana* leaves. *N. benthamiana* leaf cells expressing the indicated  
1045 fusion proteins were examined by confocal microscopy 2 days after infiltration. The asterisks  
1046 indicate the localization of the amplified insets, and the arrows indicate the merged pattern of GFP-  
1047 associated vesicles in C, D, E, F, G, H. The confocal images are representative samples from three

1048 independent experiments. Scale bars, 10  $\mu\text{m}$ . **(D)** Co-expression of the Golgi-associated G-  
1049 mCherry molecular marker and NISP-GFP in *N. benthamiana* leaves 2 days after agro-infiltration.  
1050 Scale bars, 20  $\mu\text{m}$ . **(E)** Co-expression of the tonoplast-associated vac-mCherry molecular marker  
1051 and NISP-GFP in *N. benthamiana* leaves 2 days after agro-infiltration. Scale bars, 20  $\mu\text{m}$ . **(F)** Co-  
1052 expression of the plasma membrane-associated FLS2-mCherry and NISP-GFP in *N. benthamiana*  
1053 leaves 2 days after agro-infiltration. Scale bars, 20  $\mu\text{m}$ . **(G)** Co-expression of endosome-associated  
1054 SYTA-mCherry and NISP-GFP in *N. benthamiana* leaves 2 days after agro-infiltration. Scale bars,  
1055 10  $\mu\text{m}$ . **(H)** Co-labeling of vesicles with NISP-GFP and FM4-64 in epidermal cells of *N.*  
1056 *benthamiana*. Images were taken after 2 days post infiltration of *Agrobacterium* carrying a NISP-  
1057 GFP expression vector and 1 h after infiltration of FM4-64. Scale bars, 20  $\mu\text{m}$ .

1058

#### 1059 **Fig 4. NISP interacts with NSP *in vivo*.**

1060 **(A)** NISP interacts with NSP in vesicle-like compartments, as judged by BiFC. *N. benthamiana*  
1061 leaf cells expressing NISP and NSP fused to the C-terminus (cYFP) or N-terminus (nYFP) of YFP,  
1062 or in combination with the empty vectors, were observed by confocal microscopy 3 days after  
1063 infiltration. Scale bars, 10  $\mu\text{m}$ . The experiment was repeated at least four times with identical  
1064 results. **(B)** NISP-NSP complex-containing vesicles are stained by FM4-64. *N. benthamiana* leaves  
1065 were agroinfiltrated with nYFP-NISP- and cYFP-NSP-expressing DNA constructs. Images were  
1066 taken 2 days post agroinfiltration and 30 min after infiltration of FM4-64. Arrows indicate  
1067 examples of vesicle-associated reconstituted fluorescent signals that were co-stained by FM4-64.  
1068 Scale bars, 10  $\mu\text{m}$ . The experiment was repeated three times with similar results. **(C)** NISP interacts  
1069 with NSP *in planta*. Whole cell protein extracts from *N. benthamiana* leaves expressing transiently  
1070 NISP-GFP and NSP-6HA were used for co-immunoprecipitation assays using an anti-GFP serum.

1071 Input and IP show the levels of the expressed proteins NSP-6HA, NISP-GFP, and GFP. Anti-HA  
1072 antibody was used to detect NSP-6HA from the immunoprecipitated complex. GFP was used as a  
1073 negative control. Molecular mass markers are given on the left in kilodaltons. The experiment was  
1074 repeated twice. **(D)** *In vivo* interaction of NISP with NSP. Co-immunoprecipitation was performed  
1075 as described in C, except that the tags of the transiently expressed proteins were switched to NSP-  
1076 GFP and NISP-6HA. The experiment was repeated twice.

1077

1078 **Fig 5. NISP displays a pro-begomoviral function.**

1079 **(A)** Transcript accumulation of NISP in transgenic lines. NISP transcript levels in three  
1080 independently complemented transgenic lines (*nisp-1/NISP-1-3*), three independently transformed  
1081 *NISP*-overexpressing lines (AtNISP1-3), Col-0 and *nisp-1* were determined by qRT-PCR. Gene  
1082 expression was calculated using the  $2^{-\Delta Ct}$  method, and actin was used as an endogenous control.  
1083 Error bars represent 95% confidence intervals based on replicated samples (n=3) from three  
1084 independent experiments. **(B)** NISP-GFP protein accumulation in transgenic lines. Whole cell  
1085 protein extracts from the complemented transgenic lines (*nisp-1/NISP*), *NISP*-overexpressing lines  
1086 (AtNISP), Col-0 and *nisp-1* were separated by SDS-PAGE and immunoblotted using an anti-GFP  
1087 serum. **(C)** AT2G18860 transcript accumulation in transgenic lines. The transcript levels of  
1088 AT2G18860 in complemented transgenic lines (*at2g18860-1/AT2G18860-1-3*), AT2G18860-  
1089 overexpressing lines (AT2G18860-1-3), Col-0 and *at2g18860-1* were quantified by qRT-PCR and  
1090 normalized to the actin as an endogenous control. Error bars indicate 95% confidence intervals  
1091 based on replicated samples (n=3) from three independent experiments. **(D)** AT2G18860-GFP  
1092 protein accumulation in transgenic lines. Total protein extracts from complemented transgenic  
1093 lines (*at2g18860-1/AT2G18860*), AT2G18860-overexpressing lines (AT2G18860), Col-0 and

1094 *at2g18860-1* were fractionated by SDS-PAGE and immunoblotted using anti-GFP antibody. **(E)**  
1095 CabLCV infection-associated symptoms in Arabidopsis genotypes at 21 days post-inoculation  
1096 (dpi). The figure shows representative samples of mock-inoculated and CabLCV -infected plants.  
1097 The genotypes are indicated in the figure and are the same as specified in A-D. **(F)** The onset of  
1098 infection is delayed in *nisp-1* knockout line. Ecotype Col-0, *nisp-1*, *at2g18860-1*, *nisp-1/NISP*  
1099 complemented lines and AtNISP-overexpressing lines (as in a-d) were infected with CabLCV  
1100 DNA, and the course of infection was monitored as the percent of systemically infected plants at  
1101 different dpi. **(G)** Absolute quantification of CabLCV genomic units in infected lines at 21 dpi.  
1102 The genotypes are the same as specified in a-d. Error bars indicate 95% confidence intervals based  
1103 on replicated samples from three independent experiments. Different letters indicate significant  
1104 differences among the groups (Duncan test,  $p < 0,05$ ,  $n = 3$ ).

1105

1106 **Fig 6. NISP interacts with NIG *in vivo* and NSP enhances NISP-NIG complex**  
1107 **formation.**

1108 **(A)** BIFC assay showing the interaction between NISP and NIG in vesicles of *N. benthamiana* leaf  
1109 cells. *N. benthamiana* leaves transiently expressing NISP and NIG fused to the C-terminus (cYFP)  
1110 or N-terminus (nYFP) of YFP were examined by confocal microscopy 3 days after infiltration.  
1111 Scale bars, 10  $\mu\text{m}$  and 20  $\mu\text{m}$ . The experiment was repeated three times with similar results. **(B)**  
1112 NISP-NIG complex-containing vesicles are stained by FM4-64. *N. benthamiana* leaves were  
1113 agroinfiltrated with nYFP-NIG- and cYFP-NISP-expressing DNA constructs. Images were taken  
1114 2 days post infiltration and 1 h after infiltration of FM4-64. Arrows indicate examples of vesicle-  
1115 associated reconstituted fluorescent signals that were co-stained by FM4-64 and the asterisk, the  
1116 region of the amplified inset. Scale bars, 10  $\mu\text{m}$ . The experiment was repeated three times with

1117 identical results. **(C)** In vivo interaction of NISP and NIG. Total protein extracts from *N.*  
1118 *benthamiana* expressing NISP-GFP and NIG-6HA were used for co-immunoprecipitation assays  
1119 using anti-GFP. Input and IP show the levels of the expressed proteins NISP-GFP and NIG-6HA.  
1120 Anti-HA was used to detect NIG-6HA from the immunoprecipitated complex. GFP was used as  
1121 an unrelated protein. The experiment was repeated twice with identical results. **(D)** NISP-NIG  
1122 complex formation in the presence of viral NSP. The Co-IP assay was performed as described in  
1123 A, except that co-expressed NSP-GST was included in the assay. NSP-GST was detected by  
1124 immunoprecipitating it from infiltrated leaves and immunoblotting with anti-GST. The experiment  
1125 was repeated twice with identical results. **(E)** Viral NSP enhances the interaction between NISP  
1126 and NIG. NIG levels in the immunoprecipitated complex in the presence and absence of viral NSP  
1127 were quantified using the Band Analysis tools of the ImageLab software (Bio-Rad). The signal  
1128 values were normalized using the IP NISP-GFP band, revealed in the same blot as the Co-IP band.  
1129 A.U. denotes arbitrary units.

1130

1131 **Fig 7. NISP complexes with vDNA *in vivo*.**

1132 **(A)** NISP-GFP accumulation in overexpressing lines. Whole cell protein extracts from the NISP-  
1133 GFP-overexpressing lines, as indicated in the figure, and Col-0 were separated by SDS-PAGE and  
1134 immunoblotted using an anti-GFP serum. **(B)** NISP binds to viral DNA-B *in vivo*. NISP-GFP-  
1135 overexpressing lines (AtNISP-1, AtNISP-2, and AtNISP-3), and Col-0 were inoculated with  
1136 infectious CabLCV clones prior to the ChIP assay, which was performed with leaf samples of the  
1137 indicated genotypes using anti-GFP. The infected plants were confirmed by PCR of input DNA  
1138 from inoculated plants using CabLCV DNA-B-specific primers, which amplifies a 770-bp  
1139 fragment (F1/R1; S10b Fig). IN denotes infected leaves and UN, uninfected leaves. **(C)** ChIP-

1140 qPCR assay of leaves from AtNISP-GFP transgenic lines and Col-0. The samples were  
1141 immunoprecipitated with an anti-GFP antibody and ChIPed DNA was quantified by qPCR using  
1142 the DNA-B-specific primers F3/R3 (S10b Fig). Data were normalized relative to the input of each  
1143 sample and are expressed as the percentage of input. (D) ChIP-qPCR assay using a different set of  
1144 DNA-B-specific primers (F2/R2) and samples from the indicated genotypes. The ChIP-qPCR was  
1145 performed as described in C. (E) NISP binds to viral DNA-A *in vivo*. NISP-GFP-overexpressing  
1146 lines (AtNISP-1, AtNISP-2 and AtNISP-3), and Col-0 were inoculated with infectious CabLCV  
1147 clones prior to the ChIP assay, which was performed with leaf samples of the indicated genotypes  
1148 using anti-GFP. The infected plants were confirmed by PCR of input DNA from inoculated plants  
1149 using CabLCV DNA-A-specific primers, which amplifies a 389-bp fragment (F1/R1; S10a Fig).  
1150 IN denotes infected leaves and UN, uninfected leaves. (F) ChIP-qPCR assay using a set of DNA-  
1151 A-specific primers (F2/R2, S10a Fig) and samples from the indicated genotypes. The ChIP-qPCR  
1152 was performed as described in C. The above experiments were repeated three times with similar  
1153 results.

1154

## 1155 **Supporting information**

1156 **S1 Table-** Protein-protein interactions between the viral proteins and the  
1157 Arabidopsis proteins.

1158

1159 **S2 Table-** Enriched GO terms in three categories, Biological Process, Molecular  
1160 Function, or Cellular Component ontology

1161

1162 **S3 Table.** List of primers used for cloning, PCR, RT-qPCR and qPCR

1163

1164 **S4 Table.** Expression of kanamycin resistance in the T1 generation of transgenic  
1165 Arabidopsis plants.

1166

1167 **S1 Video/Movie** -Vesicle-associated localization of NISP

1168

1169 **S1 Fig. Identification of MP- and NSP-interacting proteins.**

1170 *In vitro* synthesized 3xHA-NSP and 3xHA-MP. *In vitro* translated HA-NSP and HA-MP were  
1171 electrophoresed by SDS-PAGE and immunoblotted using an anti-HA antibody. **(B)** Protein  
1172 interaction between *in situ* synthesized Arabidopsis halo-proteins and 3xHA-MP or 3xHA-NSP.  
1173 The AtNAPPA02 high-density array containing 4600 Arabidopsis ORFS spotted in duplicates was  
1174 probed with 3xHA-MP or 3xHA-NSP, and candidate interactors were detected with an anti-HA  
1175 antibody. The bright spots are signals from candidate interactors.

1176

1177 **S2 Fig. A network of NSP- and MP-directly interacting Arabidopsis proteins.**

1178 The network was assembled by the Cytoscape software. The viral proteins are indicated in red,  
1179 MP-specifically interacting proteins in yellow, NSP-specifically interacting proteins in orange and  
1180 proteins that associate with both MP and NSP are indicated in green.

1181

1182 **S3 Fig. *In silico* analyses of NISP.**



1183 **(A)** Phylogenetic tree of syntaxin superfamily domain-containing proteins from the species  
1184 indicated. The phylogenetic tree was constructed using Bayesian inference performed with  
1185 MrBayes v3.2.2 and the mixed amino acid substitution model Wag. The syntaxin-6 domain-  
1186 containing proteins from Arabidopsis are indicated in blue, and NISP (AT4G30240) was clustered  
1187 with plant-specific syntaxin-6 proteins forming the red clade. **(B)** Phylogenetic tree of N-terminal  
1188 Syntaxin-6 domain-containing proteins. NISP (AT4G30240) clusters together with plant-specific  
1189 N-terminal syntaxin-6 proteins, which do not harbor a typical t-SNARE domain at the C-terminus.  
1190 The syntaxin-6 domain proteins from Arabidopsis are in blue. The phylogenetic tree was  
1191 constructed using Bayesian inference performed with MrBayes v3.2.2 and the mixed amino acid  
1192 substitution model Jones.

1193

#### 1194 **S4 Fig. Sequence alignment of NISP and AT2G18860**

1195 The N-terminal syntaxin-6 domain is indicated in red and the transmembrane segment in black.  
1196 The sequence alignment was performed using CLUSTAL OMEGA. Identical amino acids are  
1197 indicated with asterisks, highly conserved residues with (:), and lower conservation with (.).

1198

#### 1199 **S5 Fig. Subcellular localization of AT2G18860**

1200 AT2G18860-GFP distribution in plasma membrane-associated vesicles. *N. benthamiana* leaves  
1201 were infiltrated with *A. tumefaciens* carrying a DNA construct expressing AT2G18860-GFP under  
1202 the control of 35S promoter. Confocal images were taken 36 h post-infiltration. Approximately  
1203 200 cells were examined. Scale bars, 10  $\mu$ m.

1204

#### 1205 **S6 Fig. NISP, but not AT2G18860, expression is induced by CabLCV**

1206 NISP and AT2G18860 transcript levels were quantified by qRT-PCR in uninfected Col-0 leaves  
1207 (Col-0), tungsten-inoculated Col-0 leaves (Col-0 T), and systemically infected Col-0 leaves with  
1208 CabLCV (Col-0 IN). Gene expression was calculated using the  $2^{-\Delta C_t}$  method, and actin was used  
1209 as an endogenous control. Error bars indicate 95% confidence intervals based on replicated  
1210 samples (n = 3) from three independent experiments.

1211

1212 **S7 Fig. CabLCV infection-associated symptoms in Arabidopsis genotypes at 21 days post-**  
1213 **inoculation (dpi).** The figure shows representative samples of mock-inoculated and CabLCV -  
1214 infected plants. The genotypes are indicated in the figure.

1215

1216 **S8 Fig. The transgenic lines are visibly indistinguishable from the wild-type plants.**

1217 Columbia (Col-0) ecotype of *Arabidopsis thaliana* was used as the wild-type control for phenotype  
1218 comparison, and the Col-0 ecotype was used for generating almost all the transgenic plants except  
1219 for the complementation test in *nik1-1* and *at2g18860-1* mutants. The genotypes are the same as  
1220 in Fig. 5. Plants were grown in a growth chamber at 22°C under long-day conditions (16 h light/8  
1221 h dark). **(A)** Developmental phenotypes associated with inactivation of NISP gene and  
1222 overexpression of NISP-GFP in the R3 generation of transgenic lines at 45 days after germination.  
1223 **(B)** Developmental phenotypes associated with inactivation of NISP gene and overexpression of  
1224 NISP-GFP in the R3 generation of transgenic lines at 60 days after germination. **(C)**  
1225 Developmental phenotypes associated with inactivation of AT2G18860 gene and overexpression  
1226 of AT2G18860-GFP in the R2 generation of transgenic lines at 45 days after germination. **(D)**  
1227 Developmental phenotypes associated with inactivation of AT2G18860 gene and overexpression  
1228 of AT2G18860-GFP in the R2 generation of transgenic lines at 60 days after germination

1229

1230 **S9 Fig. NSP enhances NISP-NIG complex formation.**

1231 **(A)** NISP interacts with NIG in yeast. AD-NIG and BD-NISP fusions were expressed in yeast and  
1232 interactions between the recombinant proteins were monitored by His prototrophy in selective  
1233 medium (-Leu,-Trp,-His) and supplemented with 2.5 mM 3-AT. The co-expression of PRNIG  
1234 fused to BD and CSN5A fused to AD was used as a positive control. **(B)** Cytosolic and perinuclear  
1235 distribution of NIG-GFP. *N. benthamiana* leaves were infiltrated with *A. tumefaciens* carrying  
1236 NIG-GFP constructs with expression driven by the 35S constitutive promoter. NIG-GFP was  
1237 imaged by confocal microscopy 36 h after infiltration. **(C)** Cytosolic localization of NIG in  
1238 transgenic lines. Confocal fluorescence image of Arabidopsis root cells stably transformed with  
1239 35S:NIG-GFP. **(D)** NISP interacts with NIG *in planta*. Total protein extracts from *N. benthamiana*  
1240 expressing NISP-6HA and NIG-GFP were used for co-immunoprecipitation assays using anti-  
1241 GFP. Input and IP show the levels of the expressed proteins NISP-6HA and NIG-GFP. Anti-HA  
1242 was used to detect NISP-6HA from the immunoprecipitated complex. GFP was used as an  
1243 unrelated protein. The experiment was repeated three times. **(E)** NISP-NIG complex formation in  
1244 the presence of viral NSP. The Co-IP assay was performed as described in A, except that co-  
1245 expressed NSP-GST was included in the assay. NSP-GST was detected by immunoprecipitating  
1246 it from transfected leaves and immunoblotting with anti-GST. The experiment was repeated three  
1247 times. **(F)** The interaction of NISP and NIG is increased by the presence of viral NSP. NIG-GFP  
1248 levels in the immunoprecipitated complex in the presence and absence of viral NSP were  
1249 quantified using the Band Analysis tools of the ImageLab software (Bio-Rad). The signal values  
1250 were normalized using the IP NIG-GFP band, revealed in the same blot as the Co-IP band. A.U.  
1251 denotes arbitrary unit.

1252

1253 **S10 Fig. NISP interacts with NIG *in vivo* and NSP enhances NISP-NIG complex formation.**

1254 **(A)** BIFC assay showing the interaction between NISP and NIG in vesicles of *N. benthamiana* leaf

1255 cells. *N. benthamiana* leaves transiently expressing NISP and NIG fused to the C-terminus (cYFP)

1256 or N-terminus (nYFP) of YFP, were examined by confocal microscopy 3 days after infiltration.

1257 Scale bars, 10  $\mu\text{m}$  and 20  $\mu\text{m}$ . **(B)** Co-expression of NSP-6HA strengthens interaction between

1258 NIG and NISP. The BiFC assay was performed by agro-infiltration of *N. benthamiana* leaves with

1259 nYFP-NIG, cYFP-NISP and vice-versus along with the expression of NSP-6HA. The reconstituted

1260 fluorescence signal was observed by confocal microscopy, 3 days after agroinfiltration. The figure

1261 displays representative samples from three independent biological repeats. Scale bars, 10  $\mu\text{m}$ . **(C)**

1262 Confocal fluorescent image of NISP and NIG fused to the C-terminus (cYFP) or N-terminus

1263 (nYFP) of YFP in combination with empty vectors, as indicated in the figure.

1264

1265 **S11 Fig. Schematic representation of CabLCV DNA-A, DNA-B and ChIP-DNA primers.**

1266 **(A)** Schematic representation of DNA-A. The number 1 corresponds to the 5' end of the nick site

1267 (TAATATT/AC) within the conserved nonanucleotide sequence located in the intergenic region.

1268 The ORFs are indicated with arrows. The positions of the primers used for PCR (F1/R1), and qRT-

1269 PCR (F2/R2) are indicated. **(B)** Schematic representation of DNA-B. The numbering scheme is

1270 the same as in a. The ORFs are indicated with arrows. The positions of the primers used for PCR

1271 (F1/R1), and qRT-PCR (F2/R2 and F3/R3) are indicated.

1272

1273 Figure 1

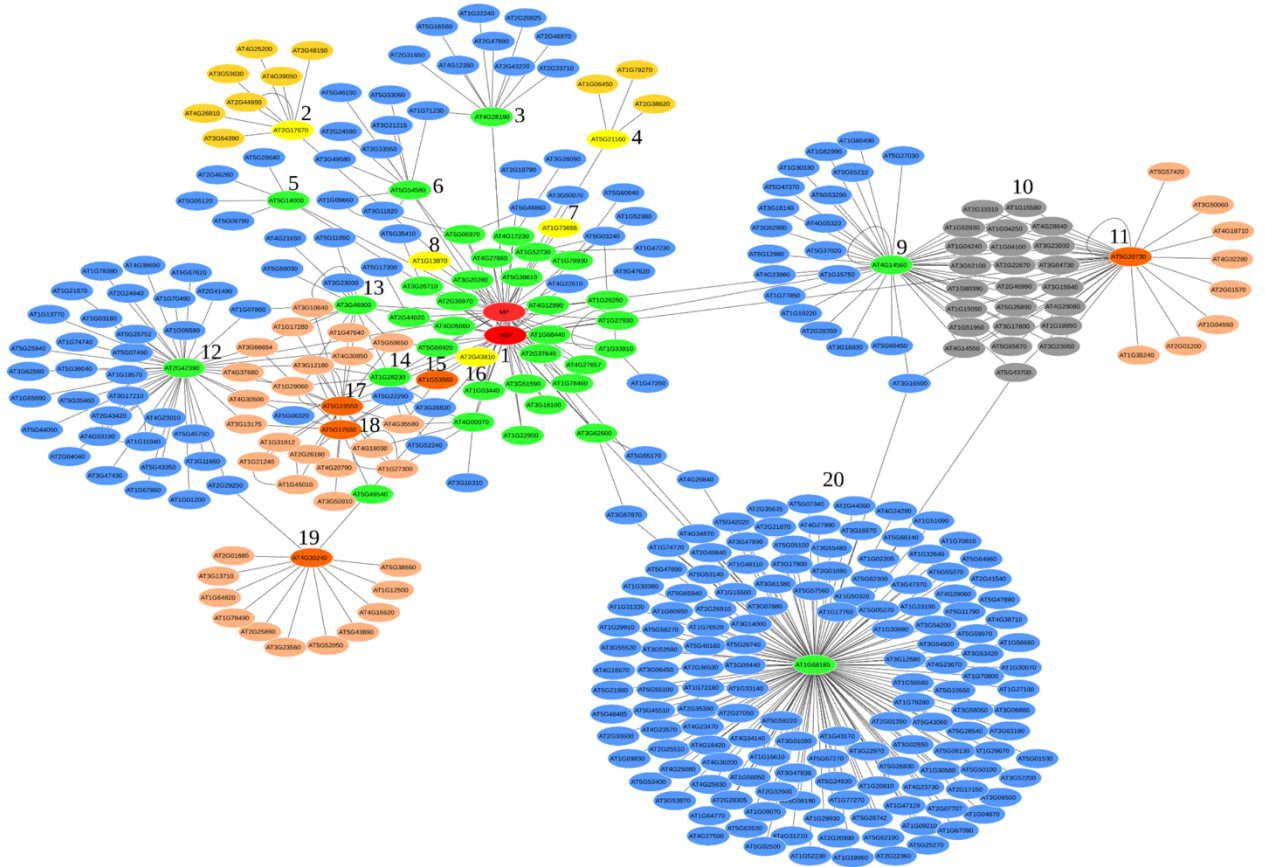

1274

1275 Figure 2

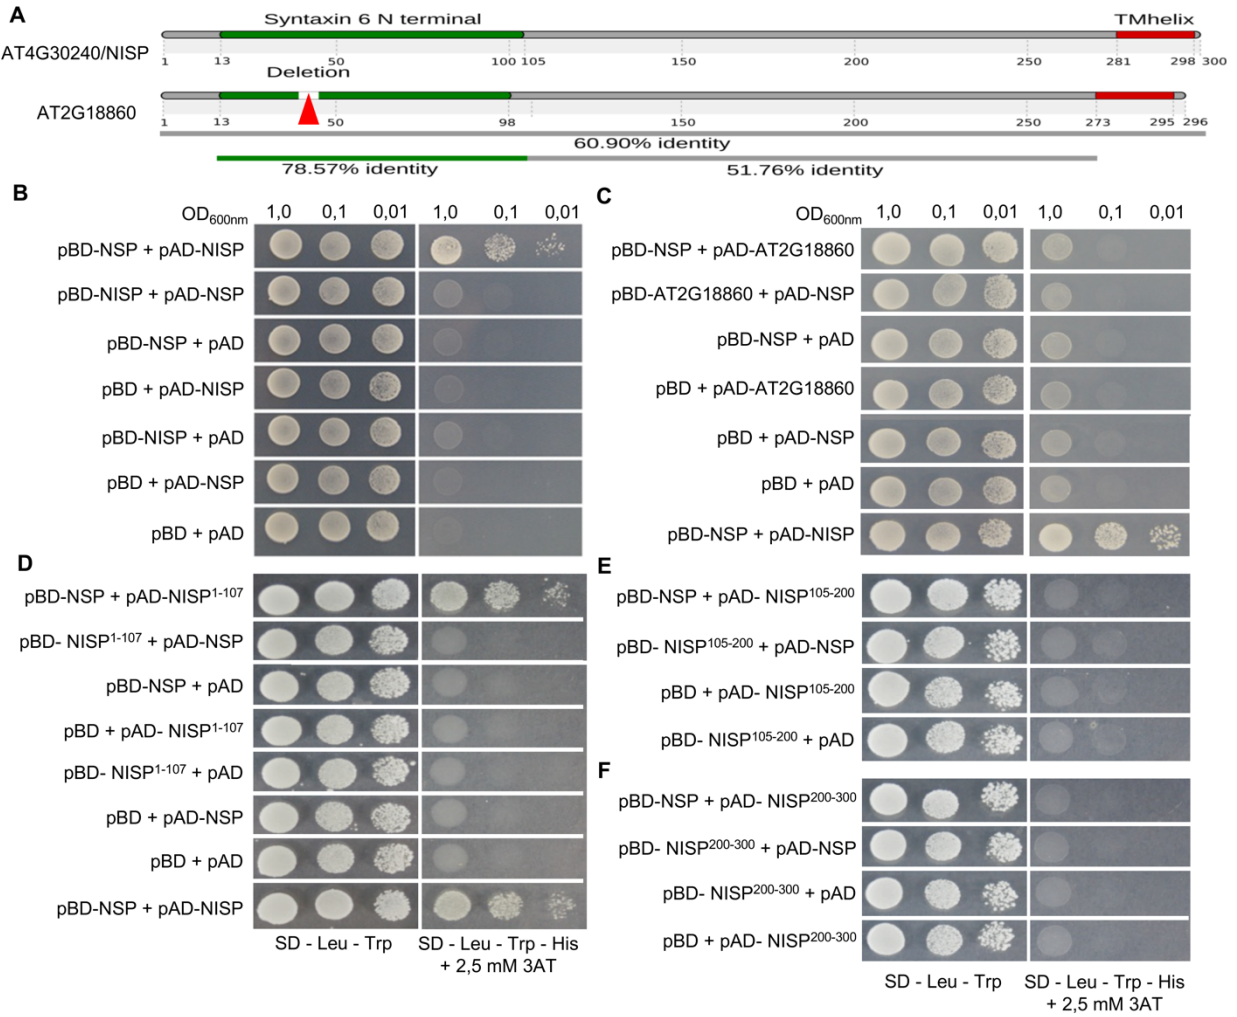

1276



1277 Figure 3

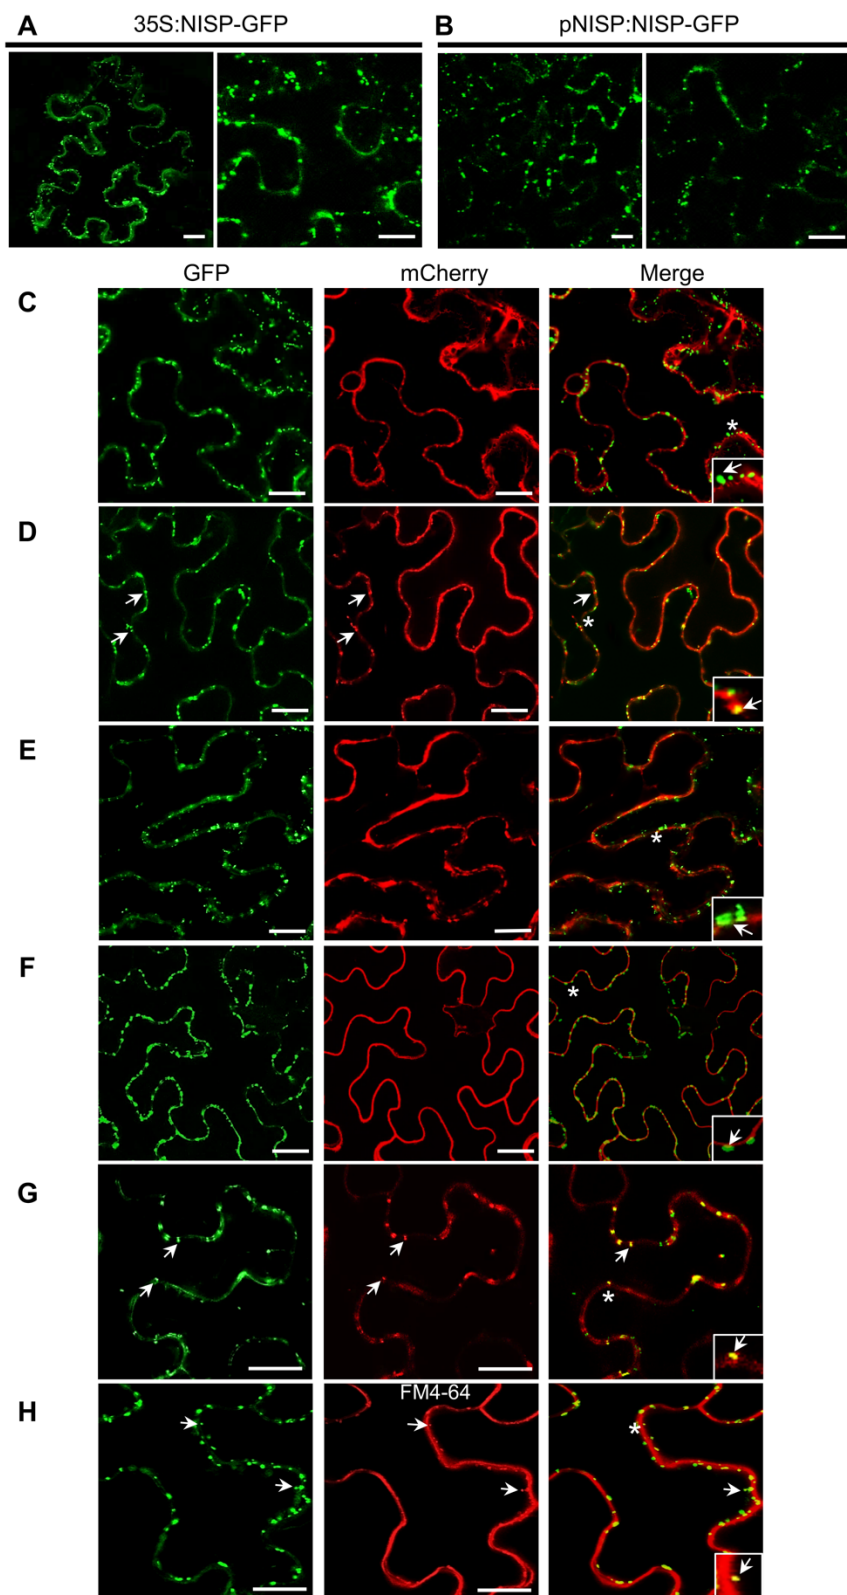

1278

1279 Figure 4

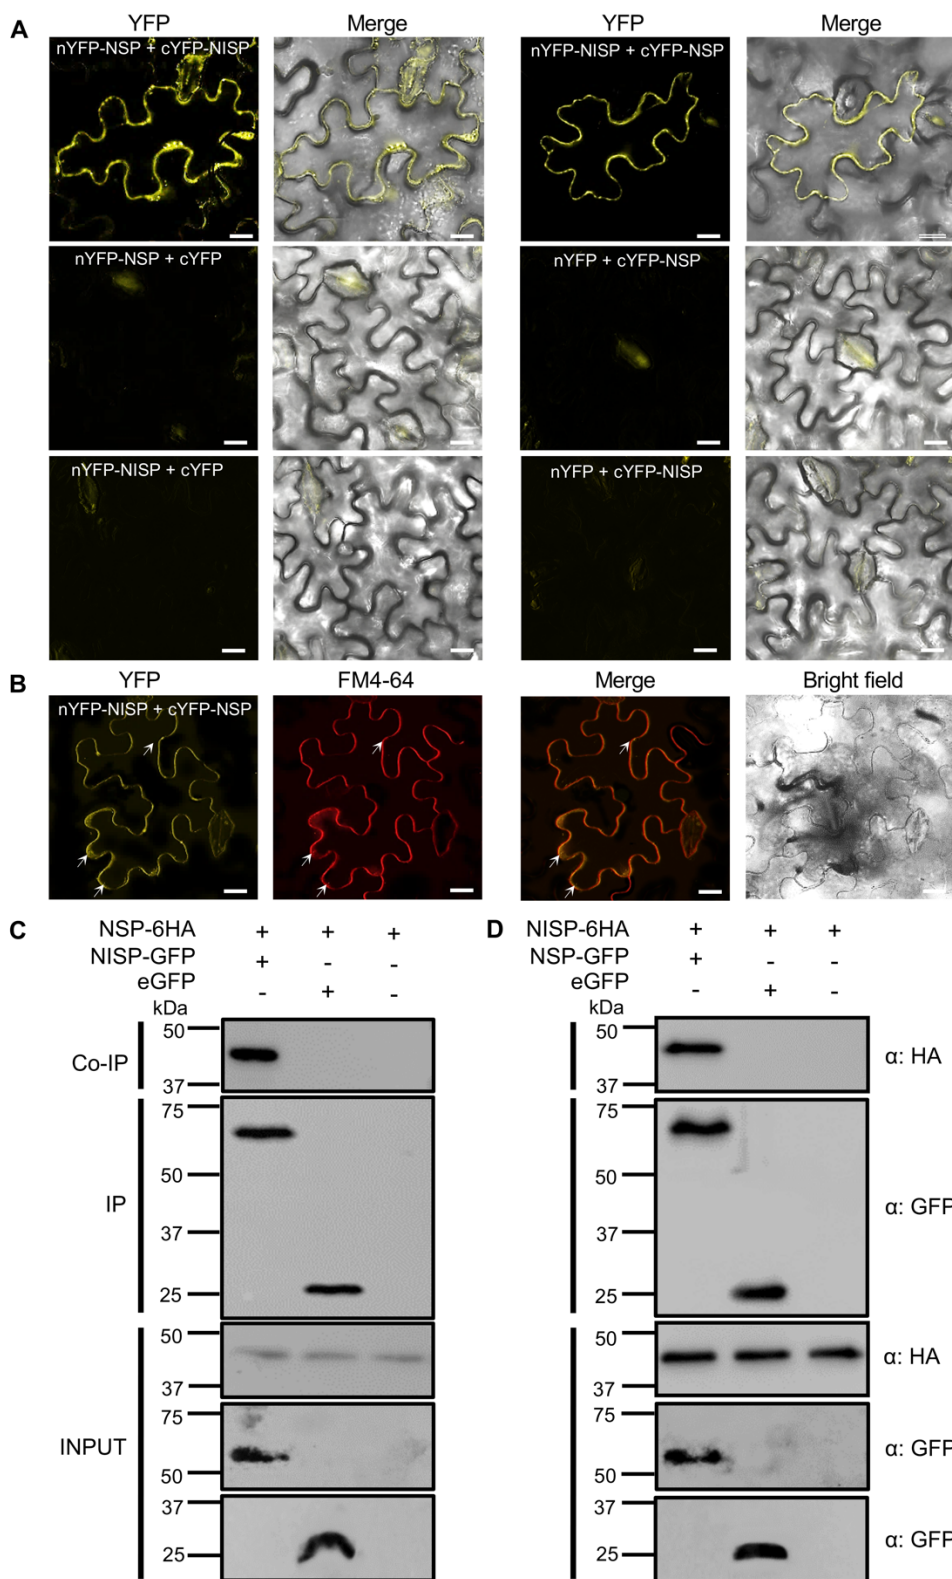

1280



1281 Figure 5

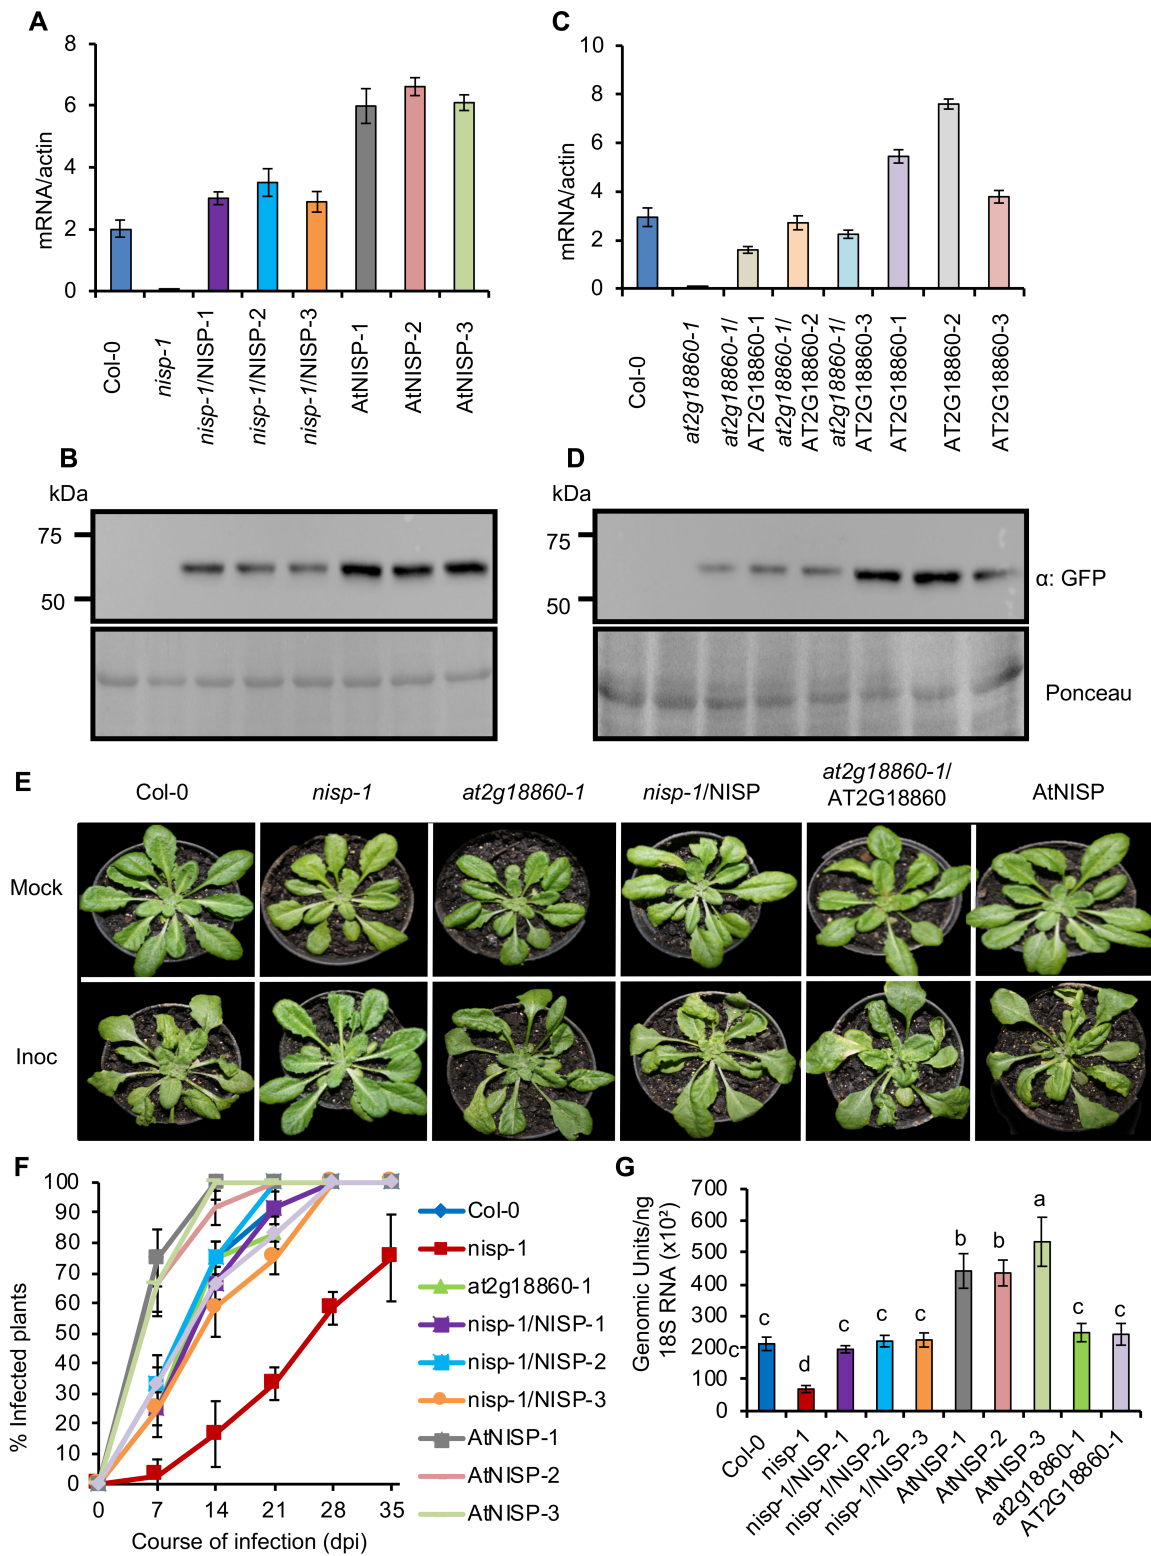

1282

1283 Figure 6

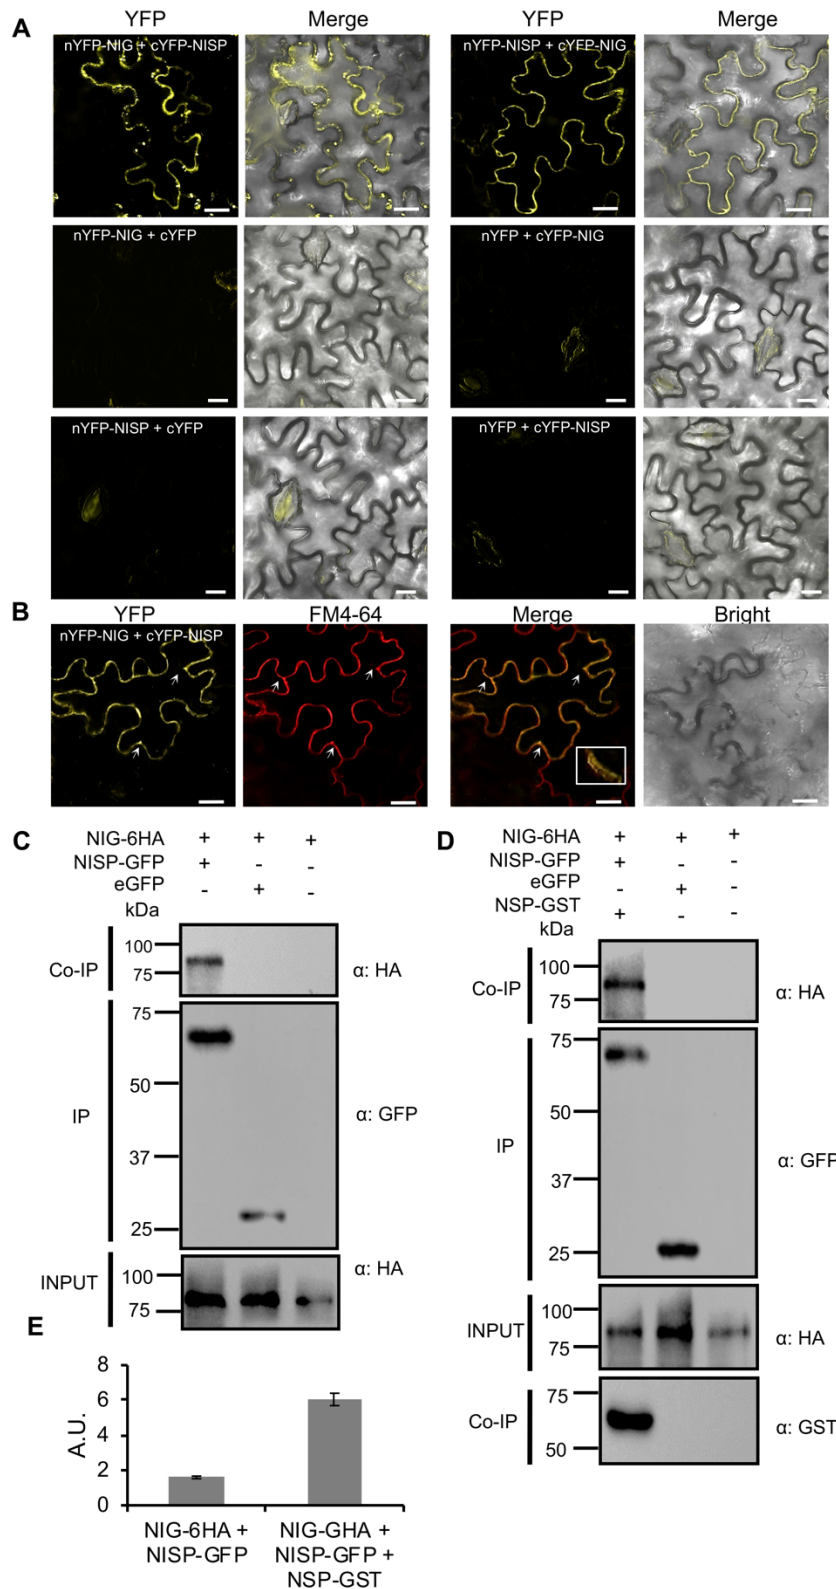

1284

1285 Figure 7

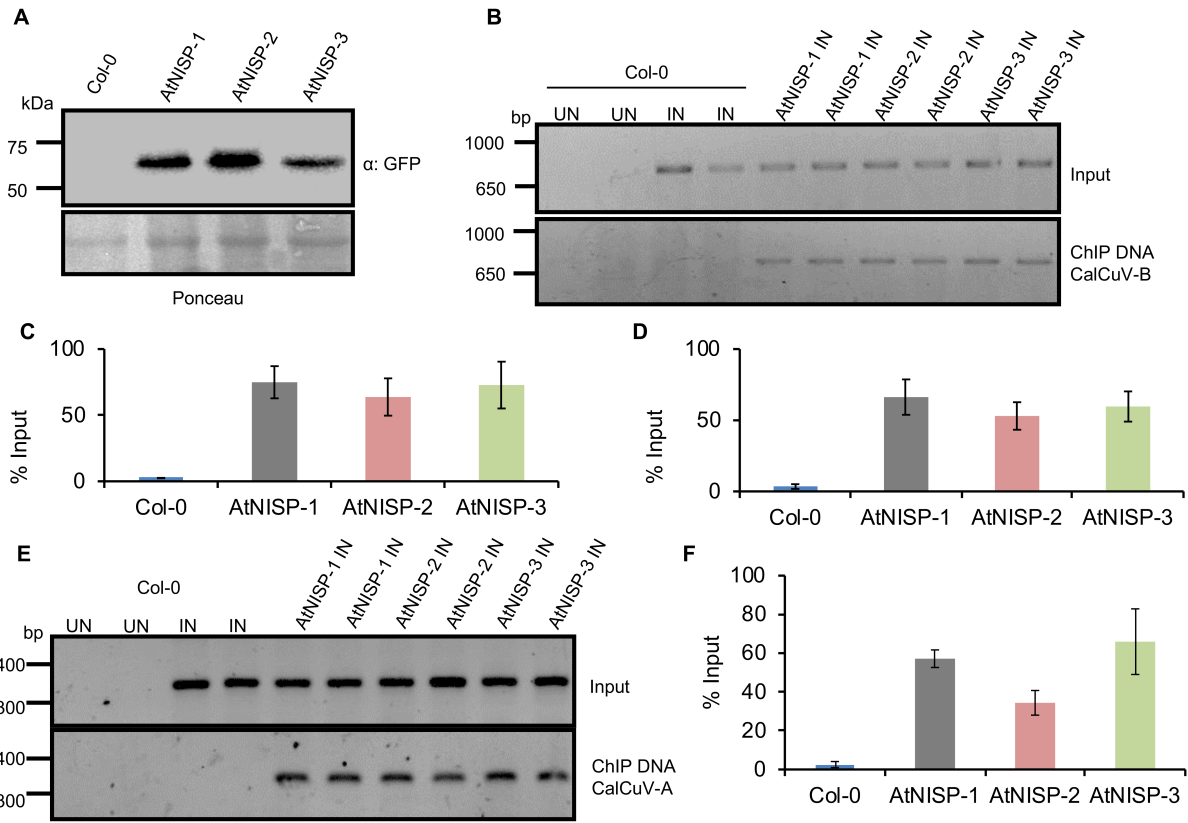

1286
